1 **Protein Phosphatase 1 regulates atypical mitotic and meiotic**  
2 **division in *Plasmodium* sexual stages**

3

4 Mohammad Zeeshan<sup>1</sup>, Rajan Pandey<sup>1,§</sup>, Amit Kumar Subudhi<sup>2,§</sup>, David J. P.  
5 Ferguson<sup>3,4,§</sup>, Gursimran Kaur<sup>1</sup>, Ravish Rashpa<sup>5</sup>, Raushan Nugmanova<sup>2</sup>, Declan  
6 Brady<sup>1</sup>, Andrew R. Bottrill<sup>6</sup>, Sue Vaughan<sup>4</sup>, Mathieu Brochet<sup>5</sup>, Mathieu Bollen<sup>7</sup>,  
7 Arnab Pain<sup>2,8</sup>, Anthony A. Holder<sup>9</sup>, David S. Guttery<sup>1,10</sup>, Rita Tewari<sup>1,\*</sup>

8

9 <sup>1</sup>*School of Life Sciences, University of Nottingham, Nottingham, UK*

10 <sup>2</sup>*Pathogen Genomics Group, BESE Division, King Abdullah University of Science*  
11 *and Technology (KAUST), Thuwal, Kingdom of Saudi Arabia*

12 <sup>3</sup>*Nuffield Department of Clinical Laboratory Sciences, University of Oxford, John*  
13 *Radcliffe Hospital, Oxford, UK*

14 <sup>4</sup>*Department of Biological and Medical Sciences, Faculty of Health and Life Science,*  
15 *Oxford Brookes University, Gipsy Lane, Oxford, UK*

16 <sup>5</sup>*Department of Microbiology and Molecular Medicine, Faculty of Medicine, University*  
17 *of Geneva, Geneva, Switzerland*

18 <sup>6</sup>*School of Life Sciences, Gibbet Hill Campus, University of Warwick, Coventry CV4*  
19 *7AL, UK*

20 <sup>7</sup>*Laboratory of Biosignaling and Therapeutics, KU Leuven Department of Cellular*  
21 *and Molecular Medicine, University of Leuven, B-3000 Leuven, Belgium.*

22 <sup>8</sup>*Research Center for Zoonosis Control, Global Institution for Collaborative Research*  
23 *and Education (GI-CoRE); Hokkaido University, Sapporo, Japan*

24 <sup>9</sup>*Malaria Parasitology Laboratory, The Francis Crick Institute, London, UK*

25 <sup>10</sup>*Leicester Cancer Research Centre, University of Leicester, Leicester, UK*

26

27 <sup>§</sup>These authors contributed equally

28 <sup>\*</sup>For correspondence

29 Rita Tewari: [rita.tewari@nottingham.ac.uk](mailto:rita.tewari@nottingham.ac.uk)

30 Short title: Role of PP1 during mitosis and meiosis in *Plasmodium*

31

32 **Abstract**

33 PP1 is a conserved eukaryotic serine/threonine phosphatase that regulates many  
34 aspects of mitosis and meiosis, often working in concert with other phosphatases,  
35 such as CDC14 and CDC25. The proliferative stages of the malaria parasite life  
36 cycle include sexual development within the mosquito vector, with male gamete  
37 formation characterized by an atypical rapid mitosis, consisting of three rounds of  
38 DNA synthesis, successive spindle formation with clustered kinetochores, and a  
39 meiotic stage during zygote to ookinete development following fertilization. It is  
40 unclear how PP1 is involved in these unusual processes. Using real-time live-cell  
41 and ultrastructural imaging, conditional gene knockdown, RNA-seq and proteomic  
42 approaches, we show that *Plasmodium* PP1 is implicated in both mitotic exit and,  
43 potentially, establishing cell polarity during zygote development in the mosquito  
44 midgut, suggesting that small molecule inhibitors of PP1 should be explored for  
45 blocking parasite transmission.

46

47

## 48 **Introduction**

49 Cell cycle progression involves sequential and highly ordered DNA replication and  
50 chromosome segregation in eukaryotes<sup>1, 2</sup>, which is tightly controlled and  
51 coordinated by reversible protein phosphorylation catalysed by protein kinases (PKs)  
52 and protein phosphatases (PPs)<sup>3</sup>. Numerous studies have highlighted the  
53 importance of the phosphoprotein phosphatase (PPP) family in regulating mitosis in  
54 model eukaryotic organisms, often working in conjunction with CDC25 and CDC14  
55 phosphatases, as key regulators of mitotic entry and exit, respectively<sup>4, 5, 6, 7</sup>.

56

57 Protein Phosphatase 1 (PP1) is a member of the PPP family and is expressed in all  
58 eukaryotic cells. It plays a key role in the progression of mitosis through  
59 dephosphorylation of a large variety of proteins, including mitotic kinases (such as  
60 cyclin-dependent kinase 1 (CDK1)<sup>8, 9, 10, 11</sup>, and regulators of chromosome  
61 segregation<sup>12</sup>. Chromosome segregation is orchestrated at the kinetochore, a protein  
62 complex that assembles on the centromeres, located at the constriction point of  
63 sister chromatids to facilitate and monitor attachment of the sister chromatids to  
64 spindle microtubules<sup>13, 14</sup>. Correct attachment of the kinetochore to spindle  
65 microtubules is regulated by the KMN (KNL1, MIS12 and NDC80) protein network<sup>15</sup>,  
66 which in mammalian cells integrates the activities of at least five protein kinases  
67 (including MPS1, Aurora B, BUB1, PLK1, and CDK1) and two protein phosphatases  
68 (PP1 and PP2A-B56). The KMN network mediates kinetochore-microtubule  
69 attachments and scaffolds the spindle assembly checkpoint (SAC) to prevent  
70 chromosome segregation until all sister chromatids are properly connected to the  
71 spindle<sup>16</sup>. The orchestration of reversible protein phosphorylation is crucial to control  
72 the spatial-temporal progression of the cell cycle and PP1 has a key role in this

73 process, in particular during mitotic exit. Throughout mitosis, PP1 is inhibited by the  
74 cyclin-dependent kinase (CDK1)/cyclin B complex and Inhibitor 1<sup>17, 18</sup>; however,  
75 during mitotic exit concomitant destruction of cyclin B and reduced activity of CDK1  
76 through dephosphorylation by CDC14 results in subsequent reactivation of PP1 via  
77 autophosphorylation and completion of mitotic exit<sup>10, 17, 19, 20, 21</sup>.

78

79 In *Plasmodium*, the causative organism of malaria, there is a single PP1 orthologue,  
80 which is expressed throughout the parasite's complex life-cycle<sup>22</sup> and located in both  
81 nucleus and cytoplasm<sup>23</sup>. *P. falciparum* PP1 (*PfPP1*) shares 80% identity with  
82 human PP1c, and likely has a conserved tertiary and secondary structure containing  
83 9  $\alpha$ -helices and 11  $\beta$ -strands<sup>24</sup>. However, *PfPP1* lacks part of the 18 amino-acid  
84 motif at the C-terminus of human PP1, which contains a threonine residue (Thr320)  
85 that is phosphorylated by CDC2 kinase<sup>25</sup> and dynamically regulates entry into  
86 mitosis<sup>24</sup>. Previous studies determined that *P. falciparum* PP1 functionally  
87 complements the *Saccharomyces cerevisiae* glc7 (PP1) homologue<sup>26</sup>, and  
88 subsequent phylogenetic analyses revealed that homologues of the phosphatases  
89 CDC14 and CDC25 are absent from *Plasmodium*<sup>23</sup>. Genetic screens and inhibitor  
90 studies have shown that PP1 is essential for asexual blood stage development<sup>23, 27,</sup>  
91 <sup>28, 29</sup> (also reviewed<sup>24</sup>), in particular for parasite egress from the host erythrocyte<sup>30</sup>.  
92 Most studies in *Plasmodium* have been focused on these asexual blood stages of  
93 parasite proliferation, and very little is known about the importance of PP1 for  
94 transmission stages within the mosquito vector. Recent phosphoproteomic studies  
95 and chemical genetics analysis have identified a number of potential *Plasmodium*  
96 *falciparum* (Pf) PP1 substrates modified during egress, including a HECT E3 protein-  
97 ubiquitin ligase and GC $\alpha$ , a guanylyl cyclase with a phospholipid transporter

98 domain<sup>30</sup>. Other biochemical studies in *Plasmodium* have identified numerous PP1-  
99 interacting partners (PIPs) that are structurally conserved and regulate PP1 activity,  
100 including LRR1 (a human SDS22 orthologue), Inhibitor 2 and Inhibitor 3. Other PIPs  
101 including eif2 $\beta$ , and GEXP15 have also been identified<sup>9, 24, 31, 32, 33</sup>. Synthetic  
102 peptides containing the RVxF motif of Inhibitor 2 and Inhibitor 3, and the LRR and  
103 the LRR cap motif of *Pf*LRR1 significantly reduce *P. falciparum* growth in vitro<sup>34, 35</sup>  
104 and regulate *Pf*PP1 phosphatase activity<sup>35, 36, 37</sup>. However, little is known regarding  
105 how PP1 is involved in regulating mitosis and meiosis in the absence of CDC14 and  
106 CDC25.

107

108 The *Plasmodium* life-cycle is characterised by several mitotic stages and a single  
109 meiotic stage (reviewed in<sup>38, 39, 40</sup>). However, in this organism kinetochore dynamics  
110 and chromosome segregation are poorly understood, especially in mitosis during  
111 male gametogenesis. This is a very rapid process with three rounds of spindle  
112 formation and genome replication from 1N to 8N within 12 minutes. In addition, little  
113 is known about the first stage of meiosis that occurs during the zygote to ookinete  
114 transition. We have followed recently the spatio-temporal dynamics of NDC80  
115 throughout mitosis in schizogony, sporogony and male gametogenesis, and during  
116 meiosis in ookinete development<sup>41</sup>, using approaches that offer the opportunity to  
117 study the key molecular players in these crucial stages of the life cycle. Although  
118 PP1 has been partially characterised and shown to have an essential role during  
119 asexual blood stage development in the vertebrate host<sup>23</sup>, the role and importance of  
120 PP1 during sexual stage development in the mosquito is completely unknown.

121

122 Here, using the *Plasmodium berghei* (Pb) mouse model of malaria, we determined  
123 the importance of PP1 during the sexual stages within the mosquito vector. PP1  
124 expression and location were studied using the endogenous, GFP-tagged protein  
125 and co-localisation with the kinetochore marker, NDC80, to follow progression  
126 through chromosome segregation during male gamete formation and zygote  
127 differentiation. Using a conditional gene knockdown approach we examined how  
128 PP1 orchestrates atypical mitosis and meiosis, and investigated the ultrastructural  
129 consequences of PP1 gene knockdown for cell morphology, nuclear pole  
130 multiplication and flagella formation during male gamete formation. RNA-Seq  
131 analysis was used to determine the consequence of PP1 gene knockdown on global  
132 transcription, which disclosed a marked differential expression of genes involved in  
133 reversible phosphorylation, motor activity and the regulation of cell polarity.  
134 Proteomics studies identified motor protein kinesins as interacting partners of PP1 in  
135 the gametocyte. The knockdown of PP1 gene expression blocks parasite  
136 transmission by the mosquito, showing that this protein has a crucial function in  
137 *Plasmodium* sexual development during both mitosis in male gamete formation and  
138 meiosis during zygote to ookinete differentiation.

139

## 140 **Results**

### 141 **PP1-GFP has a diffuse subcellular location during asexual blood stage** 142 **schizogony and forms discrete foci during endomitosis.**

143 To examine the spatio-temporal expression of *Plasmodium* PP1 in real-time during  
144 cell division, we generated a transgenic *P. berghei* line expressing endogenous PP1  
145 with a C-terminal GFP tag. An in-frame *gfp* coding sequence was inserted at the 3'  
146 end of the endogenous *pp1* locus using single crossover homologous recombination

147 **(Fig S1A)**, and successful insertion was confirmed by diagnostic PCR **(Fig S1B)**.

148 Western blot analysis of schizont protein extracts using an anti-GFP antibody

149 revealed a major 62-kDa band, the expected size for PP1-GFP protein, compared to

150 the 29 kDa WT-GFP **(Fig S1C)**.

151

152 During asexual blood stage proliferation, schizogony is characterised by multiple

153 rounds of asynchronous nuclear division without chromosome condensation or

154 cytokinesis. Nuclear division is a closed mitotic process without dissolution-

155 reformation of the nuclear envelope and with the spindle-pole body

156 (SPB)/microtubule-organising centre (MTOC) embedded within the nuclear

157 membrane<sup>42</sup>. It results in a multinucleated coenocyte termed a schizont, which is

158 resolved by cytokinesis at the end of schizogony into individual merozoites. Live cell

159 imaging of *P. berghei* asexual blood stages revealed a diffuse cytoplasmic and

160 nuclear distribution of PP1-GFP, together with a distinct single focus of concentrated

161 PP1-GFP in the nucleus of early trophozoite stage **(Fig 1A)**, representing the early

162 S-phase of the cell cycle when DNA synthesis starts. As schizogony proceeds, the

163 diffuse distribution of PP1-GFP remained; however, in early schizonts each cell

164 displayed two distinct PP1-GFP foci in close association with the stained nuclear

165 DNA. These pairs of PP1-GFP foci became clearer during the middle and late

166 schizont stages but following merozoite maturation and egress the intensity of the

167 foci diminished **(Fig 1A)**.

168

169 To study further the location of the PP1-GFP foci throughout mitosis, we generated

170 by genetic cross parasite lines expressing either PP1-GFP and the kinetochore

171 marker NDC80-mCherry<sup>41</sup> or PP1-GFP and the inner membrane complex (IMC)-

172 associated myosin A (MyoA)-mCherry. Live cell imaging of these lines revealed co-  
173 localisation of PP1-GFP and NDC80-mCherry foci close to the DNA of the nucleus  
174 through blood stage development, and especially during late schizogony and  
175 segmentation (**Fig 1B**); whereas the PP1-GFP foci at the outer periphery of the cell  
176 showed a partial co-location with MyoA-mCherry, and only during mid- to late  
177 schizogony (**Fig 1C**). Thus, in schizonts there is a concentration of PP1-GFP at the  
178 kinetochore and at a transient peripheral location during specific stages of  
179 schizogony, as well as the diffuse distribution throughout the cytoplasm (**Fig.1**).

180

181 **PP1-GFP is enriched on kinetochores during chromosome segregation**  
182 **associated with putative mitotic exit in male gametogony**

183 To study PP1 expression and location through the three rounds of DNA replication  
184 and chromosome segregation prior to nuclear division during male gametogony, we  
185 examined PP1-GFP by live-cell imaging over a 15-minute period following male  
186 gametocyte activation. Following activation with xanthurenic acid and decreased  
187 temperature, male gametocytes undergo three rounds of DNA replication and mitotic  
188 division followed by chromosome condensation and exflagellation, resulting in eight  
189 gametes<sup>43</sup>. Before activation (0 min), PP1-GFP was detected with a diffuse location  
190 throughout gametocytes (**Fig 2A**). At one minute post-activation, PP1-GFP  
191 accumulated at one end of the nucleus at a single focal point (**Fig 2A**). After 2-3 min  
192 two distinct foci were observed on one side of the nucleus, concurrent with the first  
193 round of chromosome replication/segregation (**Fig 2A**). Subsequently, four and eight  
194 PP1-GFP foci were observed at 6 to 8 min and 8 to 12 min post-activation,  
195 respectively, corresponding to the second and third rounds of chromosome  
196 replication/segregation. These discrete PP1-GFP foci dispersed prior to karyokinesis



197 and exflagellation of the mature male gamete 15 min post-activation, leaving residual  
198 protein remaining diffusely distributed throughout the remnant gametocyte and  
199 flagellum (**Fig 2A**).

200

201 To investigate further the location of PP1-GFP during spindle formation and  
202 chromosome segregation, the parasite line expressing both PP1-GFP and NDC80-  
203 mCherry was examined by live cell imaging to establish the spatio-temporal  
204 relationship of the two proteins. We found that the discrete PP1-GFP foci colocalized  
205 with NDC80-mCherry at different stages of male gametogony, including when up to  
206 eight kinetochores were visible (**Fig 2B**), but PP1-GFP was not associated with the  
207 arc-like bridges of NDC80-mCherry representing the spindle<sup>41</sup> at 2 min and 4 to 5  
208 min post activation, suggesting that PP1-GFP is only increased at the kinetochore  
209 during initiation and termination of spindle division (**Fig 2B**).

210

### 211 **PP1-GFP may determine apical polarity during zygote-ookinete development** 212 **and has a nuclear location on kinetochores during meiosis**

213 After fertilisation in the mosquito midgut, the diploid zygote differentiates into an  
214 ookinete within which the first stage of meiosis occurs. During this process DNA is  
215 duplicated to produce a tetraploid cell with four haploid genomes within a single  
216 nucleus in the mature ookinete. PP1 is known to be crucial during meiotic  
217 chromosome segregation<sup>12</sup>, and therefore we analysed the spatio-temporal  
218 expression of PP1-GFP during ookinete development using live cell imaging. PP1-  
219 GFP was expressed in both male and female gametes with a diffuse distribution,  
220 along with a single focus of intense fluorescence at one end (potentially the basal  
221 body) of each male gamete (**Fig. 3A**). Initially, the zygote also had a diffuse PP1-

222 GFP distribution, but after two hours (stage I) an enriched focus developed at the  
223 periphery of the zygote, marking the point that subsequently protruded out from the  
224 cell body and developed into the apical end of the ookinete. A strong PP1-GFP  
225 fluorescence signal remained at this apical end throughout ookinete differentiation  
226 (**Fig 3A**). In addition, PP1-GFP was enriched in the nucleus at four discrete foci in  
227 mature ookinetes (**Fig 3A**). Analysis of the parasite line expressing both PP1-GFP  
228 and NDC80-mCherry showed that these four foci correspond to the kinetochores of  
229 meiotic development in the ookinete (**Fig 3B**).

230

### 231 **PP1-GFP has a diffuse distribution with multiple nuclear foci during oocyst** 232 **development, representing endomitosis**

233 Upon maturation the ookinete penetrates the mosquito midgut wall and embeds in  
234 the basal lamina to form an oocyst. Over the course of 21 days sporogony occurs in  
235 which several rounds of closed endomitotic division produce a multiploid cell termed  
236 a sporoblast<sup>44</sup>; with subsequent nuclear division resulting in thousands of haploid  
237 nuclei and concomitant sporozoite formation. We observed multiple foci of PP1GFP  
238 along with diffused localization during oocyst development (**Fig 3C**). Dual colour  
239 imaging showed a partial co-localisation of nuclear PP1-GFP and NDC80-mCherry  
240 foci throughout oocyst development and in sporozoites (**Fig 3D**), suggesting that  
241 PP1-GFP is diffusely distributed during oocyst development but also recruited to  
242 kinetochores, as highlighted by multiple nuclear foci during oocyst development.

243

### 244 **Generation of transgenic parasites with conditional knockdown of PP1**

245 Our previous systematic analysis of the *P. berghei* protein phosphatases suggested  
246 that PP1 is likely essential for erythrocytic development<sup>23</sup>, a result which was further

247 substantiated in a recent study of *P. falciparum*<sup>30</sup>. Since little is known about the role  
248 of PP1 in cell division during the sexual stages of parasite development in the  
249 mosquito vector, we attempted to generate transgenic, conditional knockdown lines  
250 using either the auxin inducible degron (AID) or the promoter trap double  
251 homologous recombination (PTD) systems. Despite successful generation of a  
252 parasite line expressing PP1-AID, addition of indole-3-acetic acid (IAA) did not result  
253 in PP1 depletion (**Fig S2C**) and male gametogony was not affected (**Fig S2C**).  
254 Therefore, we used a promoter trap method that had been used previously for  
255 functional analysis of the condensin core subunits SMC2/4 and the APC/C complex  
256 component, APC3<sup>45, 46</sup>. Double homologous recombination was used to insert the  
257 *ama* promoter upstream of *pp1* in a parasite line that constitutively expresses GFP<sup>47</sup>.  
258 The expected outcome was a parasite expressing PP1 during asexual blood stage  
259 development, but not at high levels during the sexual stages (**Fig S2D**). This strategy  
260 resulted in the successful generation of two independent PP1PTD parasite clones  
261 (clones 3 and 5) produced in independent transfections, and integration confirmed by  
262 diagnostic PCR (**Fig S2E**). The PP1PTD clones had the same phenotype and data  
263 presented here are combined results from both clones. Quantitative real time PCR  
264 (qRT-PCR) confirmed a downregulation of *pp1* mRNA in gametocytes by  
265 approximately 90% (**Fig 4A**).

266

267 **Knockdown of PP1 gene expression during the sexual stages blocks parasite**  
268 **transmission by affecting parasite growth and development within the**  
269 **mosquito vector**

270 The PP1PTD parasites grew slower than the WT-GFP controls in the asexual blood  
271 stage (**Fig S2E**) but produced normal numbers of gametocytes in mice injected with

272 phenylhydrazine before infection. Gametocyte activation with xanthurenic acid in  
273 ookinete medium resulted in significantly fewer exflagellating PP1PTD parasites per  
274 field in comparison to WT-GFP parasites, suggesting that male gamete formation  
275 was severely retarded (**Fig. 4B**). For those few PP1PTD gametes that were released  
276 and viable, zygote-ookinete differentiation following fertilization was severely affected  
277 (**Fig 4C**), with significantly reduced numbers of fully formed, banana-shaped  
278 ookinetes. In all PP1PTD samples analysed 24 hours post-fertilisation, the vast  
279 majority of zygotes were still round, and there was a significant number of abnormal  
280 retort-shaped cells with a long thin protrusion attached to the main cell body (**Fig 4C,**  
281 **D**).

282

283 To investigate further the function of PP1 during parasite development in the  
284 mosquito, *Anopheles stephensi* mosquitoes were fed on mice infected with PP1PTD  
285 and WT-GFP parasites as a control. The number of GFP-positive oocysts on the  
286 mosquito gut wall was counted on days 7, 14 and 21 post-infection. No oocysts were  
287 detected from PP1PTD parasites; whereas WT-GFP lines produced normal oocysts  
288 (**Fig 4E, F**), all of which had undergone sporogony (**Fig 4G**). Furthermore, no  
289 sporozoites were observed in the salivary glands of PP1PTD parasite-infected  
290 mosquitoes, in contrast to WTGFP parasite-infected mosquitoes (**Fig 4H**). This lack  
291 of viable sporozoites was confirmed by bite back experiments that showed no further  
292 transmission of PP1PTD parasites, in contrast to the WTGFP lines, which showed  
293 positive blood stage infection four days after mosquito feed (**Fig S2F**).

294

295

296 **Ultrastructure analysis of PP1PTD gametocytes shows defects in nuclear pole**  
297 **and axoneme assembly**

298 To determine the ultrastructural consequences of reduced PP1 expression, WTGFP  
299 and PP1PTD gametocytes were examined at 6- and 30-min post activation (pa) by  
300 electron microscopy. At 6 min pa, the WTGFP male gametocytes exhibited an open  
301 nucleus with a number of nuclear poles (**Fig 5a**). Basal bodies and normal 9+2  
302 axonemes were often associated with the nuclear poles (**Fig 5b,c**). At 6 min pa, the  
303 PP1PTD line exhibited a similar morphology (**Fig 5d-f**). However, quantitative  
304 analysis showed that PP1PTD gametocytes were relatively less well-developed, with  
305 fewer nuclear poles (0.86 WTGFP v. 0.56 PP1PTD), basal bodies (1.03 WTGFP v.  
306 0.56 PP1PTD) and axonemes (2.57 WTGFP v. 1.27 PP1PTD), based on random  
307 sections of fifty male gametocytes in each group.

308

309 At 30 min post activation, most WTGFP male gametocytes (83%) were at a late  
310 stage of development with nuclei showing chromatin condensation (**Fig 5g**) and  
311 examples of exflagellation with the flagellate gamete protruding from the surface (**Fig**  
312 **5h**) and free male gametes (**Fig 5g, i**). In contrast, most PP1PTD male gametocytes  
313 (85%) were stalled at an early stage of development similar to that at 6 min pa (**Fig**  
314 **5j-l, Fig S3A**), based on random sections of fifty male gametocytes in each group.

315 The main morphological difference between the two parasite lines was a marked  
316 increase in the number and length of the axonemes in the PP1PTD parasites at 30  
317 min pa (**cf Figs 5a and j**). In summary, the development of PP1PTD male  
318 gametocytes was severely retarded, although axoneme growth increased.

319

320 **PP1PTD parasites have altered expression of genes involved in cell cycle**  
321 **progression, cell motility, and apical cell polarity**

322 To determine the consequences of PP1 knockdown on global mRNA transcription,  
323 we performed RNA-seq in duplicate on PP1PTD and WT-GFP gametocytes, 0 min  
324 and 30 min post-activation (**Fig 6A and B**). All replicates were clustered together  
325 based on condition (**Fig S3B**) and totals of 13 to 32 million RNA-seq reads were  
326 generated per sample for the global transcriptome (**Fig S3C**). In both 0 min and 30  
327 min activated gametocytes, *pp1* was significantly down-regulated (by more than 16-  
328 fold, q value < 0.05) in PP1PTD parasites compared to WT-GFP parasites (**Fig 6A**),  
329 thus confirming the qPCR result (**Fig 4A**). We observed significant transcriptional  
330 perturbation in both 0 min and 30 min activated gametocytes, affecting the  
331 expression of 530 and 829 genes respectively (representing ~ 10% and 16% of the  
332 total gene complement) (**Table S1**). Of the total perturbed genes, 344 and 581 were  
333 significantly down-regulated and 186 and 248 genes were significantly up-regulated  
334 in the PP1PTD parasites compared to WT-GFP controls in 0 min and 30 min  
335 activated gametocytes, respectively (**Table S1**).

336

337 To explore the biological roles of the genes down-regulated following reduced *pp1*  
338 expression, we performed gene-ontology (GO) based enrichment analysis. We  
339 observed that many genes encoding kinases, phosphatases and motor proteins  
340 were differentially expressed in either or in both 0 min or 30 mins activated  
341 gametocytes (**Fig 6C**), complementing the observations from our phenotypic  
342 analysis (**Fig 4C, D**). In addition, we also observed that many genes encoding  
343 proteins involved in cell motility, cell-cycle progression, host-cell entry and ookinete  
344 development were significantly affected in activated PP1PTD gametocytes.

345 Transcript levels measured by RNA-seq were further validated by qRT-PCR for a  
346 few selected genes modulated in gametocytes at 0 min and 30 min, and involved in  
347 regulation of cell cycle, cell motility, and ookinete invasion (**Fig 6D**).

348

349 **PP1-GFP interacts with similar proteins in schizonts and gametocytes, but**  
350 **with a predominance of microtubule motor kinesins in gametocytes**

351 Previous studies have analysed the PP1 interactome in *P. falciparum* schizonts,  
352 revealing several interacting partners<sup>32, 48</sup>. Here, we analysed the PP1 interactome in  
353 *P. berghei* schizonts and gametocytes to establish whether there were differences  
354 that might reflect distinct functions in the two stages. We immunoprecipitated PP1-  
355 GFP from lysates of schizonts following parasite culture *in vitro* for 10 hours and 24  
356 hours and from lysates of gametocytes 10 to 11 min post activation because of high  
357 PP1-GFP abundance at these stages (**Fig 7A, Table S2**). Mass spectrometric  
358 analysis of these pulldowns identified several proteins common to both schizont and  
359 gametocyte stages, suggesting similar protein complexes in both stages (**Fig 7A, B**).  
360 In addition, we also identified in the pulldown from gametocyte lysates a number of  
361 microtubule proteins that are associated with the spindle or axoneme, including  
362 kinesin-8B, kinesin-15, kinesin-13 and PF16 (**Fig 7A, B**). These proteins are specific  
363 to male gametocytes and may have important roles in axoneme assembly and male  
364 gametogony<sup>43, 49</sup>.

365

## 366 **Discussion**

367 Reversible protein phosphorylation is crucial for cell cycle progression in eukaryotes  
368 and is tightly controlled by a variety of protein kinases and phosphatases<sup>50, 51</sup>.  
369 *Plasmodium* possesses a set of divergent protein kinases and protein phosphatases,

370 which regulate many processes during cell division and parasite development  
371 throughout different stages of the life-cycle<sup>23, 52</sup>, and PP1 is quantitatively one of the  
372 most important protein phosphatases that hydrolyse serine/threonine linked  
373 phosphate ester bonds<sup>53</sup>. It is expressed in all cells and is highly conserved in  
374 organisms throughout the Eukaryota including *Plasmodium*<sup>23, 54</sup>, although a key  
375 region at the C-terminus that is known to regulate mitotic exit is missing from the  
376 parasite PP1<sup>24</sup>. It forms stable complexes with several PP1-interacting proteins  
377 (PIPs) that are diverse and differ in various organisms, control its location and  
378 function, and assist in processes throughout the cell cycle<sup>8, 55, 56, 57</sup>.

379

380 The cell cycle in *Plasmodium* differs from that of many other eukaryotes with atypical  
381 mitotic and meiotic divisions throughout its life cycle<sup>41, 43, 58</sup>. It lacks several classical  
382 cell cycle regulators including the protein phosphatases CDC14 and CDC25<sup>23</sup>, and  
383 key protein kinases including polo-like kinases<sup>52, 59</sup>. Therefore, the role of PP1, or  
384 indeed other PPPs in the absence of these protein phosphatases and kinases may  
385 be more crucial during cell division in *Plasmodium*. In the present study, we focused  
386 on the location and functional role of PP1 in mitotic division, particularly during male  
387 gametogony, and in meiosis during the zygote to ookinete transition. Both processes  
388 are essential for the sexual stage of the *Plasmodium* life cycle and are required for  
389 transmission by the mosquito vector. Our previous systematic functional analysis of  
390 the *Plasmodium* protein phosphatome<sup>23</sup> showed that PP1 has an essential role  
391 during asexual blood stage development; this finding was supported by a recent  
392 study, which showed its role in merozoite egress from the host erythrocyte<sup>30</sup>. Our  
393 findings here reveal that PP1 is also expressed constitutively and co-localises with  
394 the kinetochore protein NDC80 during different stages of *Plasmodium* asexual and



395 sexual development, hinting at a role during atypical chromosome segregation. Our  
396 conditional PP1 gene knockdown suggests that it plays a crucial role in mitotic  
397 division during male gametogony; and may regulate cell polarity in meiosis during  
398 zygote to ookinete transformation.

399

400 Male gametogony in *Plasmodium* is a rapid process with DNA replication and three  
401 mitotic divisions followed by karyokinesis and cytokinesis to form eight flagellated  
402 male gametes within 15 min of gametocyte activation<sup>41, 58</sup>. The expression and  
403 localization profiles show that although the protein is diffusely distributed throughout  
404 the cytoplasm and the nucleus, there is a cyclic enrichment of PP1-GFP at the  
405 kinetochore, associating with NDC80-mCherry during all three successive genome  
406 replication and closed mitotic divisions without nuclear division<sup>41</sup>. The accumulation  
407 of PP1-GFP at the kinetochore at the start of nuclear division and subsequent  
408 decrease upon completion is similar to the situation in other eukaryotes where the  
409 activity of PP1 increases in G2 phase, reduces during prophase and metaphase, and  
410 increases again during anaphase<sup>51</sup>. This behaviour suggests a role for PP1 in  
411 regulating rapid mitotic entry and exit during male gametogony. Further analysis of  
412 PP1 gene knockdown showed a significant decrease in male gamete formation (i.e.  
413 during male gametogony), and ultrastructural analysis revealed fewer nuclear poles  
414 and basal bodies associated with axonemes, with a concomitant absence of  
415 chromosome condensation in male gametocytes of PP1PTD parasites, suggesting a  
416 role for PP1 during chromosome segregation and gamete formation (i.e. flagella  
417 formation). A similar phenotype was observed in our recent study of a divergent  
418 *Plasmodium* cdc2-related kinase (CRK5)<sup>60</sup>. CRK5 deletion resulted in fewer nuclear  
419 poles, and no chromatin condensation, cytokinesis or flagellum formation,

420 suggesting that there may be a coordinated activity of PP1 and CRK5 in reversible  
421 phosphorylation. A recent phosphoregulation study across the short time period of  
422 male gametogony showed tightly controlled phosphorylation events mediated by  
423 several protein kinases including ARK2, CRK5, and NEK1<sup>61</sup>; however, the reciprocal  
424 protein phosphatases that reverse these events are unknown. The expression  
425 pattern and cyclic enrichment of PP1 at the kinetochores suggest a key reciprocal  
426 role of PP1 in reversing the protein phosphorylation mediated by these kinases. This  
427 interpretation is supported by our global transcriptome analysis of the PP1PTD  
428 parasite, which showed a modulated expression of several serine/threonine protein  
429 kinases, protein phosphatases and motor proteins. The similar pattern of reduced  
430 expression of some of these protein phosphatases and kinases suggests they have  
431 a coordinated role in reversible phosphorylation. Of note, phosphoregulation of motor  
432 proteins in *Plasmodium* has been described previously<sup>61</sup> and it plays an important  
433 role in spindle assembly and axoneme formation during male gametogony<sup>41, 43</sup>.

434 The proteomics analysis showed that PP1 interacts with a conserved set of proteins  
435 in both asexual and sexual stages of development, and with additional proteins in  
436 gametocytes, implicating major motor proteins that may be required for spindle and  
437 axoneme assembly during male gametogenesis. Several of the conserved  
438 interacting partners also form complexes with PP1 in other eukaryotes but the  
439 gametocyte specific proteins such as kinesin-8B, kinesin-15, kinesin-13, and PF16  
440 are unique PIPs in *Plasmodium*<sup>9, 48</sup>. These findings are consistent with our  
441 transcriptomic analysis of PP1PTD showing modulated expression of motor proteins  
442 in male gametocytes.

443 Analysis of PP1 during the zygote to ookinete transformation showed an additional  
444 location at the nascent apical end during the early stages of ookinete differentiation,

445 which may help define the cell's polarity. This suggestion is supported by the  
446 consequence of PP1PTD gene knock down in which numerous underdeveloped  
447 ookinetes with a long, thin protrusion attached to the main cell body were observed.  
448 This idea is also substantiated by a recent study showing that apical-basal polarity in  
449 *Drosophila* is controlled by PP1-mediated, and SDS22-dependent,  
450 dephosphorylation of LGL, an actomyosin-associated protein<sup>62</sup>. However, it is  
451 important to note that the suggested role in cell polarity is based on the observation  
452 that after fertilization only a few abnormal ookinetes are formed, which have the  
453 morphologically distinct elongated apical end. Our transcriptomic analysis of  
454 PP1PTD-gametocytes showed modulation of genes for several organelle markers  
455 such as CTRP and SOAP<sup>63, 64</sup>, polarity markers such as SAS6L and IMC proteins<sup>65</sup>,  
456 <sup>66</sup>, as well as genes involved in gliding motility including other IMC proteins, MyoA,  
457 GAPs, GAPMs, and some ookinete specific proteins. These proteins are important  
458 for maintenance of cell shape, gliding motility, and mosquito gut wall invasion by  
459 ookinetes. These results suggest that PP1 may be involved in the phospho-  
460 regulation of proteins involved in defining polarity and maintenance of ookinete  
461 shape.

462 In conclusion, PP1 is a constitutively expressed phosphatase, distributed throughout  
463 the cell but enriched in the nucleus, and associated with the kinetochore during  
464 mitosis and meiosis, with a role in the regulation of mitosis and meiosis throughout  
465 the *Plasmodium* life-cycle.

466

## 467 **Material and Methods**

## 468 **Ethics statement**

469 The animal work performed in the UK passed an ethical review process and was  
470 approved by the United Kingdom Home Office. Work was carried out under UK  
471 Home Office Project Licenses (30/3248 and PDD2D5182) in accordance with the  
472 United Kingdom 'Animals (Scientific Procedures) Act 1986'. Six- to eight-week-old  
473 female CD1 outbred mice from Charles River laboratories were used for all  
474 experiments in the UK.

#### 475 **Generation of transgenic parasites**

476 GFP-tagging vectors were designed using the p277 plasmid vector and  
477 transfected as described previously<sup>23</sup>. A schematic representation of the  
478 endogenous *pp1* locus (PBANKA\_1028300), the constructs and the recombined *pp1*  
479 locus can be found in **Fig S1A**. For GFP-tagging of PP1 by single crossover  
480 homologous recombination, a region of *pp1* downstream of the ATG start codon was  
481 used to generate the construct. For the genotypic analyses, a diagnostic PCR  
482 reaction was performed as outlined in **Fig. S1A**. Primer 1 (intP6tg) and primer 2  
483 (ol492) were used to determine correct integration of the *gfp* sequence at the  
484 targeted locus. For western blotting, purified gametocytes were lysed using lysis  
485 buffer (10 mM TrisHCl pH 7.5, 150 mM NaCl, 0.5 mM EDTA and 1% NP-40). The  
486 lysed samples were boiled for 10 min at 95 °C after adding Laemmli buffer and were  
487 centrifuged at maximum speed (13000g) for 5 min. The samples were  
488 electrophoresed on a 4–12% SDS-polyacrylamide gel. Subsequently, resolved  
489 proteins were transferred to nitrocellulose membrane (Amersham Biosciences).  
490 Immunoblotting was performed using the Western Breeze Chemiluminescence Anti-  
491 Rabbit kit (Invitrogen) and anti-GFP polyclonal antibody (Invitrogen) at a dilution of  
492 1:1250, according to the manufacturer's instructions.

493 To study the function of PP1, we used two conditional knock down systems; a  
494 promoter exchange/trap using double homologous recombination (PP1PTD) and an  
495 auxin inducible degron (PP1AID) system. The PP1AID construct was derived from  
496 the p277 plasmid, where the GFP sequence was excised following digestion with  
497 *AgeI* and *NotI* restriction enzymes and replaced with an AID/HA coding sequence.  
498 The AID-HA sequence was PCR amplified (using primers: 5'-  
499 CCCCAGACGTCGGATCCAATGATGGGCAGTGTGCGAGCT-3' and 5'-  
500 ATATAAGTAAGAAAAACGGCTTAAGCGTAATCTGGA-3') from the GW-AID/HA  
501 plasmid (<http://plasmogem.sanger.ac.uk/>). Fragments were assembled following the  
502 Gibson assembly protocol to generate the PP1-AID/HA transfection plasmid that was  
503 transfected in the 615 line. Conditional degradation of PP1-AID/HA was performed  
504 as described previously<sup>67</sup>. A schematic representation of the endogenous *pp1* locus  
505 (PBANKA\_1028300), the constructs and the recombined *pp1* locus can be found in  
506 **Fig S2A**. A diagnostic PCR was performed for *pp1* gene knockdown parasites as  
507 outlined in **Fig. S2A**. Primer 1 and Primer 3 were used to determine successful  
508 integration of the targeting construct at the 3' gene locus (**Fig S2B**). Primer 1 and  
509 Primer 2 were used as controls (**Fig S2B**).

510 The conditional knockdown construct PP1-PTD was derived from *P<sub>ama1</sub>* (pSS368))  
511 where *pp1* was placed under the control of the *ama1* promoter, as described  
512 previously<sup>68</sup>. A schematic representation of the endogenous *pp1* locus, the  
513 constructs and the recombined *pp1* locus can be found in **Fig S2D**. A diagnostic  
514 PCR was performed for *pp1* gene knockdown parasites as outlined in **Fig. S2D**.  
515 Primer 1 (5'-intPTD36) and Primer 2 (5'-intPTD) were used to determine successful  
516 integration of the targeting construct at the 5' gene locus. Primer 3 (3'-intPTD) and  
517 Primer 4 (3'-intPTama1) were used to determine successful integration for the 3' end

518 of the gene locus (**Fig. S2E**). All the primer sequences can be found in **Table S3**. *P.*  
519 *berghei* ANKA line 2.34 (for GFP-tagging) or ANKA line 507cl1 expressing GFP (for  
520 the knockdown construct) parasites were transfected by electroporation<sup>47</sup>.

### 521 **Purification of schizonts and gametocytes**

522 Blood cells obtained from infected mice (day 4 post infection) were cultured for 11h  
523 and 24 h at 37°C (with rotation at 100 rpm) and schizonts were purified the following  
524 day on a 60% v/v NycoDenz (in PBS) gradient, (NycoDenz stock solution: 27.6% w/v  
525 NycoDenz in 5 mM Tris-HCl, pH 7.20, 3 mM KCl, 0.3 mM EDTA).

526 The purification of gametocytes was achieved using a protocol described  
527 previously<sup>69</sup> with some modifications. Briefly, parasites were injected into  
528 phenylhydrazine treated mice and enriched by sulfadiazine treatment after 2 days of  
529 infection. The blood was collected on day 4 after infection and gametocyte-infected  
530 cells were purified on a 48% v/v NycoDenz (in PBS) gradient (NycoDenz stock  
531 solution: 27.6% w/v NycoDenz in 5 mM Tris-HCl, pH 7.20, 3 mM KCl, 0.3 mM  
532 EDTA). The gametocytes were harvested from the interface and activated.

### 533 **Live cell imaging**

534 To examine PP1-GFP expression during erythrocyte stages, parasites growing in  
535 schizont culture medium were used for imaging at different stages (ring, trophozoite,  
536 schizont and merozoite) of development. Purified gametocytes were examined for  
537 GFP expression and localization at different time points (0, 1-15 min) after activation  
538 in ookinete medium<sup>43</sup>. Zygote and ookinete stages were analyzed throughout 24 h of  
539 culture. Images were captured using a 63x oil immersion objective on a Zeiss Axio  
540 Imager M2 microscope fitted with an AxioCam ICc1 digital camera (Carl Zeiss, Inc).

### 541 **Generation of dual tagged parasite lines**

542 The PP1-GFP parasites were mixed with NDC80-cherry and MyoA-cherry parasites  
543 in equal numbers and injected into mice. Mosquitoes were fed on mice 4 to 5 days  
544 after infection when gametocyte parasitaemia was high. These mosquitoes were  
545 checked for oocyst development and sporozoite formation at day 14 and day 21 after  
546 feeding. Infected mosquitoes were then allowed to feed on naïve mice and after 4 - 5  
547 days, and the mice were examined for blood stage parasitaemia by microscopy with  
548 Giemsa-stained blood smears. In this way, some parasites expressed both PP1-GFP  
549 and NDC80-cherry; and PP1-GFP and MyoA-cherry in the resultant gametocytes,  
550 and these were purified and fluorescence microscopy images were collected as  
551 described above.

## 552 **Parasite phenotype analyses**

553 Blood containing approximately 50,000 parasites of the PP1PTD line was injected  
554 intraperitoneally (i.p.) into mice to initiate infections. Asexual stages and gametocyte  
555 production were monitored by microscopy on Giemsa-stained thin smears. Four to  
556 five days post infection, exflagellation and ookinete conversion were examined as  
557 described previously<sup>70</sup> with a Zeiss AxioImager M2 microscope (Carl Zeiss, Inc)  
558 fitted with an AxioCam ICc1 digital camera. To analyse mosquito transmission, 30–  
559 50 *Anopheles stephensi* SD 500 mosquitoes were allowed to feed for 20 min on  
560 anaesthetized, infected mice with an asexual parasitaemia of 15% and a comparable  
561 number of gametocytes as determined on Giemsa-stained blood films. To assess  
562 mid-gut infection, approximately 15 guts were dissected from mosquitoes on day 14  
563 post feeding, and oocysts were counted on an AxioCam ICc1 digital camera fitted to  
564 a Zeiss AxioImager M2 microscope using a 63x oil immersion objective. On day 21  
565 post-feeding, another 20 mosquitoes were dissected, and their guts crushed in a  
566 loosely fitting homogenizer to release sporozoites, which were then quantified using

567 a haemocytometer or used for imaging. Mosquito bite back experiments were  
568 performed 21 days post-feeding using naive mice, and blood smears were examined  
569 after 3-4 days.

#### 570 **Electron microscopy**

571 Gametocytes activated for 6 min and 30 min were fixed in 4% glutaraldehyde in 0.1  
572 M phosphate buffer and processed for electron microscopy as previously  
573 described<sup>71</sup>. Briefly, samples were post fixed in osmium tetroxide, treated *en bloc*  
574 with uranyl acetate, dehydrated and embedded in Spurr's epoxy resin. Thin sections  
575 were stained with uranyl acetate and lead citrate prior to examination in a JEOL  
576 JEM-1400 electron microscope (JEOL Ltd, UK)

#### 577 **Quantitative Real Time PCR (qRT-PCR) analyses**

578 RNA was isolated from gametocytes using an RNA purification kit (Stratagene).  
579 cDNA was synthesised using an RNA-to-cDNA kit (Applied Biosystems). Gene  
580 expression was quantified from 80 ng of total RNA using a SYBR green fast master  
581 mix kit (Applied Biosystems). All the primers were designed using the primer3  
582 software (<https://primer3.ut.ee/>). Analysis was conducted using an Applied  
583 Biosystems 7500 fast machine with the following cycling conditions: 95°C for 20 s  
584 followed by 40 cycles of 95°C for 3 s; 60°C for 30 s. Three technical replicates and  
585 three biological replicates were performed for each assayed gene. The *hsp70*  
586 (PBANKA\_081890) and *arginyl-t RNA synthetase* (PBANKA\_143420) genes were  
587 used as endogenous control reference genes. The primers used for qPCR can be  
588 found in **Table S1**.

#### 589 **Transcriptome study using RNA-seq**



590 For RNA extraction, parasite samples were passed through a plasmodipur column to  
591 remove host DNA contamination prior to RNA isolation. Total RNA was extracted  
592 from activated gametocytes and schizonts of WT-GFP and PP1PTD parasites (two  
593 biological replicates each) using an RNeasy purification kit (Qiagen). RNA was  
594 vacuum concentrated (SpeedVac) and transported using RNA-stable tubes  
595 (Biomatrica). Strand-specific 354mRNA sequencing was performed on total RNA  
596 and using TruSeq stranded mRNA sample prep 355kit LT (Illumina), as previously  
597 described<sup>72</sup>. Libraries were sequenced using an Illumina Hiseq 4000 sequencing  
598 platform with paired-end 150 bp read chemistry. The quality of the raw reads was  
599 assessed using FATSQC  
600 (<http://www.bioinformatics.babraham.ac.uk/projects/fastqc>). Low-quality reads and  
601 Illumina adaptor sequences from the read ends were removed using Trimmomatic  
602 R<sup>73</sup>. Processed reads were mapped to the *P. berghei* ANKA reference genome  
603 (release 40 in PlasmoDB - <http://www.plasmodb.org>) using Hisat2<sup>74</sup> (V 2.1.0) with  
604 parameter “—rna-strandness FR”. Counts per feature were estimated using  
605 FeatureCounts<sup>75</sup>. Raw read counts data were converted to counts per million (cpm)  
606 and genes were excluded if they failed to achieve a cpm value of 1 in at least one of  
607 the three replicates performed. Library sizes were scale-normalized by the TMM  
608 method using EdgeR software<sup>76</sup> and further subjected to linear model analysis using  
609 the voom function in the limma package<sup>77</sup>. Differential expression analysis was  
610 performed using DeSeq2<sup>78</sup>. Genes with a fold-change greater than two and a false  
611 discovery rate corrected p-value (Benjamini-Hochberg procedure) < 0.05 were  
612 considered to be differentially expressed. Functional groups shown in Figure 6C  
613 were inferred from annotations available in PlasmoDB: Release 49  
614 (<https://plasmodb.org/plasmo/app>).

## 615 **Immunoprecipitation and Mass Spectrometry**

616 Schizonts, following 11 hours and 24 hours, respectively in *in vitro* culture, and  
617 male gametocytes 11 min post activation were used to prepare cell lysates.  
618 Purified parasite pellets were crosslinked using formaldehyde (10 min incubation  
619 with 1% formaldehyde, followed by 5 min incubation in 0.125M glycine solution  
620 and 3 washes with phosphate buffered saline (PBS) (pH, 7.5).  
621 Immunoprecipitation was performed using crosslinked protein and a GFP-Trap<sup>®</sup>\_A  
622 Kit (Chromotek) following the manufacturer's instructions. Proteins bound to the  
623 GFP-Trap<sup>®</sup>\_A beads were digested using trypsin and the peptides were analysed  
624 by LC-MS/MS. Briefly, to prepare samples for LC-MS/MS, wash buffer was  
625 removed, and ammonium bicarbonate (ABC) was added to beads at room  
626 temperature. We added 10 mM TCEP (Tris-(2-carboxyethyl) phosphine  
627 hydrochloride) and 40 mM 2-chloroacetamide (CAA) and incubation was performed  
628 for 5 min at 70° C. Samples were digested using 1 µg Trypsin per 100 µg protein at  
629 room temperature overnight followed by 1% TFA addition to bring the pH into the  
630 range of 3-4 before mass spectrometry.

## 631 **Statistical analysis**

632 All statistical analyses were performed using GraphPad Prism 8 (GraphPad  
633 Software). An unpaired t-test and two-way anova test were used to examine  
634 significant differences between wild-type and mutant strains for qRT-PCR and  
635 phenotypic analysis accordingly.

636

637 **Data Availability.** RNA Sequence reads have been deposited in the NCBI  
638 Sequence gene expression omnibus with the accession number GSE164175.

639 "The mass spectrometry proteomics data have been deposited to the  
640 ProteomeXchange Consortium with the dataset identifier PXD023571 and  
641 10.6019/PXD023571.

642

#### 643 **Author contributions.**

644 RT and MZ conceived and designed all experiments. RT, MZ, RP, DB, DSG, GK  
645 performed the GFP tagging and conditional knockdown with promoter trap  
646 experiments. RR and MBr generated and characterised the PP1-AID/HA line. MZ,  
647 RP, GK, DB and RT performed protein pull-down experiments. ARB performed mass  
648 spectrometry. AS, RN and AP performed RNA sequencing (RNA-seq). DJPF and  
649 SV performed electron microscopy. RT, AAH, MZ, DSG, AS, RN, AP and DJPF  
650 analyzed the data. MZ, DSG and RT wrote the original draft. RT, AAH, AP, DJPF,  
651 MB edited and reviewed the manuscript and all other contributed to it.

652

653 **Acknowledgments.** We thank Julie Rodgers for helping to maintain the insectary  
654 and other technical works, and the personnel at the Bioscience Core Laboratory  
655 (BCL) in KAUST for sequencing the RNA samples and producing the raw datasets.

656

#### 657 **Funding**

658 This work was supported by: MRC UK (G0900278, MR/K011782/1, MR/N023048/1)  
659 and BBSRC (BB/N017609/1) to RT and MZ; the Francis Crick Institute (FC001097),  
660 the Cancer Research UK (FC001097), the UK Medical Research Council  
661 (FC001097), and the Wellcome Trust (FC001097) to AAH; the Swiss National

662 Science Foundation project grant 31003A\_179321 to MBr; a faculty baseline fund  
663 (BAS/1/1020-01-01) and a Competitive Research Grant (CRG) award from OSR  
664 (OSR-2018-CRG6-3392) from the King Abdullah University of Science and  
665 Technology to AP. MBr is an INSERM and EMBO young investigator. This research  
666 was funded in whole, or in part, by the Wellcome Trust [FC001097]. For the purpose  
667 of Open Access, the author has applied a CC BY public copyright licence to any  
668 Author Accepted Manuscript version arising from this submission.'

669

## 670 **Figure legends**

671 **Fig. 1. Location of PP1 during asexual blood stage schizogony and its**  
672 **association with kinetochore (Ndc80) and glideosome (MyosinA)**

673 **(A)** Live cell imaging of PP1-GFP (Green) showing its location during different stages  
674 of intraerythrocytic development and in free merozoites. DIC: Differential  
675 interference contrast; Hoechst: stained DNA (blue); Merge: green and blue images  
676 merged. A schematic guide showing the locations of PP1GFP foci during  
677 segmentation of merozoites is depicted in right hand panel. **(B)** Live cell imaging  
678 showing location of PP1-GFP (green) in relation to the kinetochore marker NDC80-  
679 mCherry (red) and DNA (Hoechst, blue). Merge: green, red and blue images  
680 merged. A schematic guide showing the locations of PP1GFP foci with NDC80-  
681 mCherry during segmentation of merozoites is depicted in right hand panel. **(C)** Live  
682 imaging showing the location of PP1-GFP (green) in relation to inner membrane  
683 complex marker MyoA-mCherry (red) and DNA (Hoechst, blue) during different  
684 stages of intraerythrocytic development and in extracellular merozoites. A schematic  
685 guide showing the locations of PP1GFP foci with NDC80-mCherry and MyoA-  
686 mCherry during segmentation of merozoites is depicted in the three right-hand

687 panels. Merge: green, red and blue images merged. Sch-E (Early schizont), Sch-M  
688 (Middle schizont), Sch-L (Late schizont) Sch-S (Segmented schizont). In all panels,  
689 scale bar = 5  $\mu$ m.

690

691 **Fig. 2. The location of PP1 and its association with the kinetochore during**  
692 **chromosome segregation in male gametogony.**

693 **(A)** Live-cell imaging of PP1-GFP during male gametogony showing an initial  
694 diffused localization before activation and focal points after activation in the later  
695 stages (shown as minutes post activation). Panels are DIC, Hoechst (blue, DNA),  
696 PP1-GFP (green) and Merge (green and blue channels). **(B)** Live-cell imaging of  
697 parasite line expressing both PP1-GFP and NDC80-mCherry showing location of  
698 PP1 (green) and NDC80 (red) in male gametocytes at different time points after  
699 activation. A schematic guide showing the locations of PP1GFP foci with DNA and  
700 NDC80-mCherry during male gametogony is depicted in the right panel. Merge/DNA  
701 is green, red and blue (Hoechst, DNA) channels. In both panels, scale bar = 5  $\mu$ m.

702

703 **Fig. 3. PP1-GFP localization during zygote formation, ookinete development,**  
704 **and sporogony inside the mosquito gut**

705 **(A)** Live cell imaging showing PP1-GFP location in male and female gametes,  
706 zygote and during ookinete development (stages I to V and mature ookinete). A cy3-  
707 conjugated antibody, 13.1, which recognises the P28 protein on the surface of  
708 zygotes and ookinetes, was used to mark these stages. Panels: DIC (differential  
709 interference contrast), PP1-GFP (green, GFP), 13.1 (red), Merged: Hoechst (blue,  
710 DNA), PP1-GFP (green, GFP) and P28 (red). Scale bar = 5  $\mu$ m. Insets show, at  
711 higher magnification, the PP1-GFP signal on the zygote and developing apical end

712 of early stage 'retorts', and in the nucleus of late retorts and ookinete stage. **(B)** Live  
713 cell imaging of PP1-GFP (green) in relation to NDC80-mCherry (red) and Hoechst  
714 staining (blue, DNA) in zygote and ookinete stages. **(C)** Live cell imaging of PP1-  
715 GFP in developing oocysts in mosquito guts at 7-, 14- and 21-days post-infection  
716 and in a sporozoite. Panels: DIC, Hoechst (blue, DNA), PP1-GFP (green), Merged  
717 (blue and green channels). **(D)** Live cell imaging of PP1-GFP in relation to NDC80 in  
718 developing oocysts and in a sporozoite. Panels: DIC (differential interference  
719 contrast), PP1-GFP (green), NDC80-mCherry (red), Merge (Hoechst, blue, DNA;  
720 PP1-GFP, green; NDC80-mCherry, red). Scale bar = 5  $\mu$ m

721

722 **Fig. 4. PP1 has an important role during male gamete formation and zygote -**  
723 **ookinete development (A)** qRT-PCR analysis of *pp1* transcription in PP1PTD and  
724 WT-GFP parasites, showing the downregulation of *pp1*. Each bar is the mean of  
725 three biological replicates  $\pm$  SD. **(B)** Male gametogony (exflagellation) of PP1PTD  
726 line (black bar) and WT-GFP line (white bar) measured as the number of  
727 exflagellation centres per field. Mean  $\pm$  SD; n=3 independent experiments. **(C)**  
728 Ookinete conversion as a percentage for PP1PTD and WT-GFP parasites.  
729 Ookinetes were identified using P28 antibody as a surface marker and defined as  
730 those cells that differentiated successfully into elongated 'banana shaped' ookinetes.  
731 Round cells show zygotes that did not start to transform and 'retorts' could not  
732 differentiate successfully in ookinetes. Mean  $\pm$  SD; n=3 independent experiments.  
733 **(D)** Representative images of round cells, retorts and fully differentiated ookinetes.  
734 **(E)** Total number of GFP-positive oocysts per infected mosquito in PP1PTD and WT-  
735 GFP parasites at 7-, 14- and 21-days post infection (dpi). Mean  $\pm$  SD; n=3  
736 independent experiments. **(F)** Representative images of mosquito midguts on day 14

737 showing them full of oocysts in WTGFP and no oocyst in PP1PTD **(G)** Total number  
738 of sporozoites in oocysts of PP1PTD and WT-GFP parasites at 14 and 21 dpi. Mean  
739  $\pm$  SD; n=3 independent experiments. **(H)** Total number of sporozoites in salivary  
740 glands of PP1PTD and WT-GFP parasites. Bar diagram shows mean  $\pm$  SD; n=3  
741 independent experiments. Unpaired t-test was performed for statistical analysis.  
742 \*p<0.05, \*\*p<0.01, \*\*\*p<0.001.

743

744 **Figure 5: Ultrastructure analysis of PP1PTD gametocytes shows defects in**  
745 **nuclear pole and axoneme assembly during male gametogony**

746 Electron micrographs of WTGFP (a-c, g-i) and PP1PTD (d-f, j-l) male gametocytes at  
747 6 min (a-f) and 30 min (g-i) post activation (pa). Bars represent 1  $\mu$ m (a, d, g, j) and  
748 100 nm in all other micrographs. **(a)** Low power micrograph of a WTGFP male  
749 gametocyte with two nuclear poles (NP) associated with the nucleus (N). **(b)**  
750 Enlargement of the enclosed area showing the nuclear pole (NP) with adjacent basal  
751 body (B) and associated axoneme (A). **(c)** Cross section of an axoneme showing the  
752 9+2 microtubule arrangement. **(d)** Low power micrograph of PP1PTD male  
753 gametocyte showing the central nucleus (N) with a nuclear pole and associated  
754 basal body (enclosed area). **(e)** Enlargement of the enclosed area showing the  
755 nuclear pole (NP) with adjacent basal body (B) and associated axoneme (A). **(f)**  
756 Cross section through an axoneme showing the 9+2 arrangement of microtubules.  
757 **(g)** Low power micrograph of a 30 min pa WTGFP male gametocyte showing the  
758 nucleus with areas of condensed chromatin. Note the cross sectioned free male  
759 gametes (Mg). A – axoneme. **(h)** Periphery of a male gametocyte undergoing  
760 exflagellation with the nucleus (N) associated with flagellum (F) protruding from the  
761 surface. **(i)** Cross section of a free male gamete showing the 9+2 microtubules of the

762 flagellum (F) and electron dense nucleus (N). **(j)** Low power micrograph of a  
763 PP1PTD male gametocyte at 30 min pa showing the central nucleus (N) with a  
764 nuclear pole and an increased number of axoneme profiles (A) within the cytoplasm.  
765 **(k)** Detail of the periphery of a nucleus showing the nuclear pole (NP), basal body  
766 (B) and associated axoneme (A). **(l)** Cross section of an axoneme showing the 9+2  
767 microtubule arrangement.

768

769 **Figure 6: Transcriptome of PP1PTD mutant reveals important roles of PP1 in**  
770 **parasite cell cycle, motor protein function, and cell polarity during gametocyte**  
771 **biology**

772 Volcano plots showing significantly down-regulated (blue  $\text{Log}_2$  fold  $\leq -1$ , q value <  
773 0.05) and up-regulated genes (brown  $\text{Log}_2$  fold  $\geq 1$ , q value < 0.05) in PP1PTD  
774 compared to wild-type lines in non (0 min)-activated gametocytes **(A)** and 30 min  
775 activated gametocytes **(B)**. Non-differentially regulated genes are represented as  
776 black dots. **(C)** Expression heat maps showing affected genes from specific  
777 functional classes of proteins such as kinases, phosphatases, motor proteins and  
778 proteins associated with parasite motility, entry into the host cell, ookinete surface  
779 and cell cycle. Genes are ordered based on their differential expression pattern in  
780 non-activated gametocytes. **(D)** Validation by qRT-PCR of a few genes randomly  
781 selected based on the RNA-seq data. All the experiments were performed three  
782 times in duplicate with two biological replicates. \*p  $\leq 0.05$ .

783

784 **Fig. 7. Interacting partners of PP1 during asexual schizont and sexual**  
785 **gametocyte stages**



786 **(A)** List of proteins interacting with PP1 during schizont and gametocyte stages. **(B)**  
787 Venn diagram showing common interacting partners in schizonts and gametocytes  
788 with some additional proteins specific to gametocytes.

789

## 790 **Supplementary figures**

### 791 **Fig. S1. Generation and genotypic analysis of PP1GFP parasites**

792 **(A)** Schematic representation for 3'-tagging of *pp1* gene with green fluorescent  
793 protein (GFP) sequence via single homologous recombination. **(B)** Integration PCR  
794 showing correct integration of tagging construct. **(C)** Western blot showing expected  
795 size of PP1-GFP protein.

796

### 797 **Fig. S2. Generation and genotype analysis of conditional knockdown** 798 **PP1 parasites**

799 **(A)** Schematic representation of auxin inducible degron (AID) strategy to generate  
800 PP1AID parasites. **(B)** Integration PCR of the PP1AID construct in the *pp1* locus.  
801 Primer 1 and Primer 2 were used for control PCR while primer 1 and primer 3 were  
802 used to determine successful integration of AID-HA sequence and selectable marker  
803 at 3'-end of *pp1* locus **(C)** PP1AID protein expression level as measured by western  
804 blotting upon addition of auxin to mature purified gametocytes;  $\alpha$ -tubulin serves as a  
805 loading control. Auxin treatment of PP1AID showed no defect in exflagellation (error  
806 bars show standard deviation from the mean; technical replicates from three  
807 independent infections. **(D)** Schematic representation of the promoter swap strategy  
808 (PP1PTD, placing *pp1* under the control of the *ama1* promoter) by double  
809 homologous recombination. Arrows 1 and 2 indicate the primer positions used to  
810 confirm 5' integration and arrows 3 and 4 indicate the primers used for 3' integration.

811 **(E)** Integration PCR of the promotor swap construct into the *pp1* locus. Primer 1 (5'-  
812 IntPTD36) with primer 2 (5'-IntPTD) were used to determine successful integration of  
813 the selectable marker. Primer 3 (3'-intPTama1) and primer 4 (3'-IntPTD36) were  
814 used to determine the successful integration of *ama1* promoter. Primer 1 (5'-  
815 IntPTD36) and primer 4 (3'-IntPTD36) were used to show complete knock-in of the  
816 construct and the absence of a band at 2.1 kb (endogenous) resulting in complete  
817 knock-in of the construct. **(F)** Parasitaemia during blood stage schizogony showing a  
818 significant slow growth of PP1PTD compared to WTGFP parasites. Experiment was  
819 done with three mice each with 1000 parasites per mice injected intraperitoneally.  
820 \*\*\*P<0.001 **(G)** Bite back experiments show no transmission of PP1PTD parasites  
821 (black bar) from mosquito to mouse, while successful transmission was shown by  
822 WT-GFP parasites. Mean  $\pm$  SD; n= 3 independent experiments.

823

824 **Fig. S3. Analysis of PP1PTD development and RNA seq analysis:**

825 **(A)** The quantification of electron microscopy data showing PP1PTD male  
826 gametocytes halted at an early stage of development in comparison with WTGFP  
827 male gametocytes at 30 min post activation. These data are based on analysis of  
828 fifty random sections of male gametocytes per sample.

829 **(B)** Clustered dendrogram of two biological replicates of WTGFP and PP1PTD  
830 mutant parasite lines during gametocyte stage using hierarchical clustering  
831 algorithm. Analysis was performed on normalized count data. **(C)** RNA-seq read  
832 statistics.

833

834 **Supplementary Tables**

835 **Table S1. Differentially expressed genes in PP1PTD parasites**

836 **Table S2. List of proteins pulled down by PP1GFP**

837 **Table S3. Primers used in this study**

838

839 **References**

840 1. Marston AL, Amon A. Meiosis: cell-cycle controls shuffle and deal. *Nat Rev*  
841 *Mol Cell Biol* **5**, 983-997 (2004).

842

843 2. Sullivan M, Morgan DO. Finishing mitosis, one step at a time. *Nat Rev Mol*  
844 *Cell Biol* **8**, 894-903 (2007).

845

846 3. Novak B, Kapuy O, Domingo-Sananes MR, Tyson JJ. Regulated protein  
847 kinases and phosphatases in cell cycle decisions. *Curr Opin Cell Biol* **22**, 801-  
848 808 (2010).

849

850 4. Afshar K, Werner ME, Tse YC, Glotzer M, Gonczy P. Regulation of cortical  
851 contractility and spindle positioning by the protein phosphatase 6 PPH-6 in  
852 one-cell stage *C. elegans* embryos. *Development* **137**, 237-247 (2010).

853

854 5. Boutros R, Dozier C, Ducommun B. The when and wheres of CDC25  
855 phosphatases. *Curr Opin Cell Biol* **18**, 185-191 (2006).

856

857 6. Chen F, *et al.* Multiple protein phosphatases are required for mitosis in  
858 *Drosophila*. *Curr Biol* **17**, 293-303 (2007).

859

- 860 7. Stegmeier F, Amon A. Closing mitosis: the functions of the Cdc14  
861 phosphatase and its regulation. *Annu Rev Genet* **38**, 203-232 (2004).
- 862
- 863 8. Bollen M, Gerlich DW, Lesage B. Mitotic phosphatases: from entry guards to  
864 exit guides. *Trends Cell Biol* **19**, 531-541 (2009).
- 865
- 866 9. Heroes E, Lesage B, Gornemann J, Beullens M, Van Meervelt L, Bollen M.  
867 The PP1 binding code: a molecular-lego strategy that governs specificity.  
868 *FEBS J* **280**, 584-595 (2013).
- 869
- 870 10. Holder J, Poser E, Barr FA. Getting out of mitosis: spatial and temporal  
871 control of mitotic exit and cytokinesis by PP1 and PP2A. *FEBS Lett* **593**,  
872 2908-2924 (2019).
- 873
- 874 11. Nilsson J. Protein phosphatases in the regulation of mitosis. *J Cell Biol* **218**,  
875 395-409 (2019).
- 876
- 877 12. Hattersley N, *et al.* A Nucleoporin Docks Protein Phosphatase 1 to Direct  
878 Meiotic Chromosome Segregation and Nuclear Assembly. *Dev Cell* **38**, 463-  
879 477 (2016).
- 880
- 881 13. Cheeseman IM. The kinetochore. *Cold Spring Harb Perspect Biol* **6**, a015826  
882 (2014).

883

884 14. Nagpal H, Fukagawa T. Kinetochore assembly and function through the cell  
885 cycle. *Chromosoma* **125**, 645-659 (2016).

886

887 15. Varma D, Salmon ED. The KMN protein network--chief conductors of the  
888 kinetochore orchestra. *J Cell Sci* **125**, 5927-5936 (2012).

889

890 16. Lampert F, Westermann S. A blueprint for kinetochores - new insights into the  
891 molecular mechanics of cell division. *Nat Rev Mol Cell Biol* **12**, 407-412  
892 (2011).

893

894 17. Wu JQ, *et al.* PP1-mediated dephosphorylation of phosphoproteins at mitotic  
895 exit is controlled by inhibitor-1 and PP1 phosphorylation. *Nat Cell Biol* **11**,  
896 644-651 (2009).

897

898 18. Dohadwala M, *et al.* Phosphorylation and inactivation of protein phosphatase  
899 1 by cyclin-dependent kinases. *Proc Natl Acad Sci U S A* **91**, 6408-6412  
900 (1994).

901

902 19. Bouchoux C, Uhlmann F. A quantitative model for ordered Cdk substrate  
903 dephosphorylation during mitotic exit. *Cell* **147**, 803-814 (2011).

904

905 20. Grallert A, *et al.* A PP1-PP2A phosphatase relay controls mitotic progression.  
906 *Nature* **517**, 94-98 (2015).

907

908 21. Mochida S, Hunt T. Protein phosphatases and their regulation in the control of  
909 mitosis. *EMBO Rep* **13**, 197-203 (2012).

910

911 22. Howick VM, *et al.* The Malaria Cell Atlas: Single parasite transcriptomes  
912 across the complete Plasmodium life cycle. *Science* **365**, (2019).

913

914 23. Guttery David S, *et al.* Genome-wide Functional Analysis of Plasmodium  
915 Protein Phosphatases Reveals Key Regulators of Parasite Development and  
916 Differentiation. *Cell Host & Microbe* **16**, 128-140 (2014).

917

918 24. Khalife J, Freville A, Gnangnon B, Pierrot C. The Multifaceted Role of Protein  
919 Phosphatase 1 in Plasmodium. *Trends Parasitol*, (2020).

920

921 25. Kwon YG, Lee SY, Choi Y, Greengard P, Nairn AC. Cell cycle-dependent  
922 phosphorylation of mammalian protein phosphatase 1 by cdc2 kinase. *Proc*  
923 *Natl Acad Sci U S A* **94**, 2168-2173 (1997).

924

925 26. Bhattacharyya MK, Hong Z, Kongkasuriyachai D, Kumar N. Plasmodium  
926 falciparum protein phosphatase type 1 functionally complements a glc7  
927 mutant in *Saccharomyces cerevisiae*. *Int J Parasitol* **32**, 739-747 (2002).

928

929 27. Zhang M, *et al.* Uncovering the essential genes of the human malaria parasite  
930 *Plasmodium falciparum* by saturation mutagenesis. *Science* **360**, (2018).

931

932 28. Bushell E, *et al.* Functional Profiling of a Plasmodium Genome Reveals an  
933 Abundance of Essential Genes. *Cell* **170**, 260-272 e268 (2017).

934

935 29. Yokoyama D, Saito-Ito A, Asao N, Tanabe K, Yamamoto M, Matsumura T.  
936 Modulation of the growth of Plasmodium falciparum in vitro by protein  
937 serine/threonine phosphatase inhibitors. *Biochem Biophys Res Commun* **247**,  
938 18-23 (1998).

939

940 30. Paul AS, *et al.* Co-option of Plasmodium falciparum PP1 for egress from host  
941 erythrocytes. *Nat Commun* **11**, 3532 (2020).

942

943 31. Fardilha M, Esteves SL, Korrodi-Gregorio L, da Cruz e Silva OA, da Cruz e  
944 Silva FF. The physiological relevance of protein phosphatase 1 and its  
945 interacting proteins to health and disease. *Curr Med Chem* **17**, 3996-4017  
946 (2010).

947

948 32. Hollin T, *et al.* Essential role of GEXP15, a specific Protein Phosphatase type  
949 1 partner, in Plasmodium berghei in asexual erythrocytic proliferation and  
950 transmission. *PLoS Pathog* **15**, e1007973 (2019).

951

952 33. Lenne A, *et al.* Characterization of a Protein Phosphatase Type-1 and a  
953 Kinase Anchoring Protein in Plasmodium falciparum. *Front Microbiol* **9**, 2617  
954 (2018).

955

956 34. Freville A, *et al.* Plasmodium falciparum encodes a conserved active inhibitor-  
957 2 for Protein Phosphatase type 1: perspectives for novel anti-plasmodial  
958 therapy. *BMC Biol* **11**, 80 (2013).

959

960 35. Freville A, *et al.* Identification of a Plasmodium falciparum inhibitor-2 motif  
961 involved in the binding and regulation activity of protein phosphatase type 1.  
962 *FEBS J* **281**, 4519-4534 (2014).

963

964 36. Freville A, *et al.* Plasmodium falciparum inhibitor-3 homolog increases protein  
965 phosphatase type 1 activity and is essential for parasitic survival. *J Biol Chem*  
966 **287**, 1306-1321 (2012).

967

968 37. Pierrot C, Zhang X, Zanghi G, Freville A, Rebollo A, Khalife J. Peptides  
969 derived from Plasmodium falciparum leucine-rich repeat 1 bind to  
970 serine/threonine phosphatase type 1 and inhibit parasite growth in vitro. *Drug*  
971 *Des Devel Ther* **12**, 85-88 (2018).

972

973 38. Gerald N, Mahajan B, Kumar S. Mitosis in the human malaria parasite  
974 Plasmodium falciparum. *Eukaryot Cell* **10**, 474-482 (2011).

975

976 39. Guttery DS, Roques M, Holder AA, Tewari R. Commit and Transmit:  
977 Molecular Players in Plasmodium Sexual Development and Zygote  
978 Differentiation. *Trends Parasitol* **31**, 676-685 (2015).



979

980 40. Matthews H, Duffy CW, Merrick CJ. Checks and balances? DNA replication  
981 and the cell cycle in Plasmodium. *Parasit Vectors* **11**, 216 (2018).

982

983 41. Zeeshan M, *et al.* Real-time dynamics of Plasmodium NDC80 reveals unusual  
984 modes of chromosome segregation during parasite proliferation. *J Cell Sci*  
985 **134**, (2020).

986

987 42. Arnot DE, Ronander E, Bengtsson DC. The progression of the intra-  
988 erythrocytic cell cycle of Plasmodium falciparum and the role of the centriolar  
989 plaques in asynchronous mitotic division during schizogony. *Int J Parasitol* **41**,  
990 71-80 (2011).

991

992 43. Zeeshan M, *et al.* Plasmodium kinesin-8X associates with mitotic spindles and  
993 is essential for oocyst development during parasite proliferation and  
994 transmission. *PLoS Pathog* **15**, e1008048 (2019).

995

996 44. Vaughan JA. Population dynamics of Plasmodium sporogony. *Trends*  
997 *Parasitol* **23**, 63-70 (2007).

998

999 45. Pandey R, *et al.* Plasmodium Condensin Core Subunits SMC2/SMC4 Mediate  
1000 Atypical Mitosis and Are Essential for Parasite Proliferation and Transmission.  
1001 *Cell Rep* **30**, 1883-1897 e1886 (2020).

1002

1003 46. Wall RJ, *et al.* Plasmodium APC3 mediates chromosome condensation and  
1004 cytokinesis during atypical mitosis in male gametogenesis. *Sci Rep* **8**, 5610  
1005 (2018).

1006

1007 47. Janse CJ, *et al.* High efficiency transfection of Plasmodium berghei facilitates  
1008 novel selection procedures. *Molecular and biochemical parasitology* **145**, 60-  
1009 70 (2006).

1010

1011 48. Hollin T, De Witte C, Lenne A, Pierrot C, Khalife J. Analysis of the interactome  
1012 of the Ser/Thr Protein Phosphatase type 1 in Plasmodium falciparum. *BMC*  
1013 *Genomics* **17**, 246 (2016).

1014

1015 49. Straschil U, *et al.* The Armadillo repeat protein PF16 is essential for flagellar  
1016 structure and function in Plasmodium male gametes. *PloS one* **5**, e12901  
1017 (2010).

1018

1019 50. Gelens L, Qian J, Bollen M, Saurin AT. The Importance of Kinase-  
1020 Phosphatase Integration: Lessons from Mitosis. *Trends Cell Biol* **28**, 6-21  
1021 (2018).

1022

1023 51. Nasa I, Rusin SF, Kettenbach AN, Moorhead GB. Aurora B opposes PP1  
1024 function in mitosis by phosphorylating the conserved PP1-binding RVxF motif  
1025 in PP1 regulatory proteins. *Sci Signal* **11**, (2018).

1026

- 1027 52. Tewari R, *et al.* The Systematic Functional Analysis of Plasmodium Protein  
1028 Kinases Identifies Essential Regulators of Mosquito Transmission. *Cell Host &*  
1029 *Microbe* **8**, 377-387 (2010).
- 1030
- 1031 53. Ceulemans H, Bollen M. Functional diversity of protein phosphatase-1, a  
1032 cellular economizer and reset button. *Physiol Rev* **84**, 1-39 (2004).
- 1033
- 1034 54. Lesage B, Qian J, Bollen M. Spindle checkpoint silencing: PP1 tips the  
1035 balance. *Curr Biol* **21**, R898-903 (2011).
- 1036
- 1037 55. Peggie MW, MacKelvie SH, Bloecher A, Knatko EV, Tatchell K, Stark MJ.  
1038 Essential functions of Sds22p in chromosome stability and nuclear localization  
1039 of PP1. *J Cell Sci* **115**, 195-206 (2002).
- 1040
- 1041 56. Rodrigues NT, Lekomtsev S, Jananji S, Kriston-Vizi J, Hickson GR, Baum B.  
1042 Kinetochores-localized PP1-Sds22 couples chromosome segregation to polar  
1043 relaxation. *Nature* **524**, 489-492 (2015).
- 1044
- 1045 57. Verbinnen I, Ferreira M, Bollen M. Biogenesis and activity regulation of protein  
1046 phosphatase 1. *Biochem Soc Trans* **45**, 89-99 (2017).
- 1047
- 1048 58. Sinden RE. Mitosis and meiosis in malarial parasites. *Acta Leidensia* **60**, 19-  
1049 27 (1991).

1050

1051 59. Solyakov L, *et al.* Global kinomic and phospho-proteomic analyses of the  
1052 human malaria parasite *Plasmodium falciparum*. *Nat Commun* **2**, 565 (2011).

1053

1054 60. Balestra AC, *et al.* A divergent cyclin/cyclin-dependent kinase complex  
1055 controls the atypical replication of a malaria parasite during gametogony and  
1056 transmission. *Elife* **9**, (2020).

1057

1058 61. Invergo BM, Brochet M, Yu L, Choudhary J, Beltrao P, Billker O. Sub-minute  
1059 Phosphoregulation of Cell Cycle Systems during *Plasmodium* Gamete  
1060 Formation. *Cell Rep* **21**, 2017-2029 (2017).

1061

1062 62. Moreira S, Osswald M, Ventura G, Goncalves M, Sunkel CE, Morais-de-Sa E.  
1063 PP1-Mediated Dephosphorylation of Lgl Controls Apical-basal Polarity. *Cell*  
1064 *Rep* **26**, 293-301 e297 (2019).

1065

1066 63. Dessens JT, *et al.* CTRP is essential for mosquito infection by malaria  
1067 ookinetes. *EMBO J* **18**, 6221-6227 (1999).

1068

1069 64. Dessens JT, *et al.* SOAP, a novel malaria ookinete protein involved in  
1070 mosquito midgut invasion and oocyst development. *Molecular microbiology*  
1071 **49**, 319-329 (2003).

1072

- 1073 65. Poulin B, *et al.* Unique apicomplexan IMC sub-compartment proteins are early  
1074 markers for apical polarity in the malaria parasite. *Biol Open* **2**, 1160-1170  
1075 (2013).
- 1076
- 1077 66. Wall RJ, *et al.* SAS6-like protein in Plasmodium indicates that conoid-  
1078 associated apical complex proteins persist in invasive stages within the  
1079 mosquito vector. *Sci Rep* **6**, 28604 (2016).
- 1080
- 1081 67. Philip N, Waters AP. Conditional Degradation of Plasmodium Calcineurin  
1082 Reveals Functions in Parasite Colonization of both Host and Vector. *Cell Host*  
1083 *Microbe* **18**, 122-131 (2015).
- 1084
- 1085 68. Sebastian S, *et al.* A Plasmodium calcium-dependent protein kinase controls  
1086 zygote development and transmission by translationally activating repressed  
1087 mRNAs. *Cell Host Microbe* **12**, 9-19 (2012).
- 1088
- 1089 69. Beetsma AL, van de Wiel TJ, Sauerwein RW, Eling WM. Plasmodium berghei  
1090 ANKA: purification of large numbers of infectious gametocytes. *Exp Parasitol*  
1091 **88**, 69-72 (1998).
- 1092
- 1093 70. Guttery DS, *et al.* A putative homologue of CDC20/CDH1 in the malaria  
1094 parasite is essential for male gamete development. *PLoS Pathog* **8**, e1002554  
1095 (2012).
- 1096

- 1097 71. Ferguson DJ, *et al.* Maternal inheritance and stage-specific variation of the  
1098 apicoplast in *Toxoplasma gondii* during development in the intermediate and  
1099 definitive host. *Eukaryot Cell* **4**, 814-826 (2005).
- 1100
- 1101 72. Roques M, *et al.* Plasmodium centrin PbCEN-4 localizes to the putative  
1102 MTOC and is dispensable for malaria parasite proliferation. *Biol Open* **8**,  
1103 (2019).
- 1104
- 1105 73. Bolger AM, Lohse M, Usadel B. Trimmomatic: a flexible trimmer for Illumina  
1106 sequence data. *Bioinformatics* **30**, 2114-2120 (2014).
- 1107
- 1108 74. Kim D, Langmead B, Salzberg SL. HISAT: a fast spliced aligner with low  
1109 memory requirements. *Nature methods* **12**, 357-360 (2015).
- 1110
- 1111 75. Liao Y, Smyth GK, Shi W. featureCounts: an efficient general purpose  
1112 program for assigning sequence reads to genomic features. *Bioinformatics*  
1113 **30**, 923-930 (2014).
- 1114
- 1115 76. Robinson MD, McCarthy DJ, Smyth GK. edgeR: a Bioconductor package for  
1116 differential expression analysis of digital gene expression data. *Bioinformatics*  
1117 **26**, 139-140 (2010).
- 1118
- 1119 77. Ritchie ME, *et al.* limma powers differential expression analyses for RNA-  
1120 sequencing and microarray studies. *Nucleic acids research* **43**, e47 (2015).

1121

1122 78. Love MI, Huber W, Anders S. Moderated estimation of fold change and  
1123 dispersion for RNA-seq data with DESeq2. *Genome Biol* **15**, 550 (2014).

1124

1125

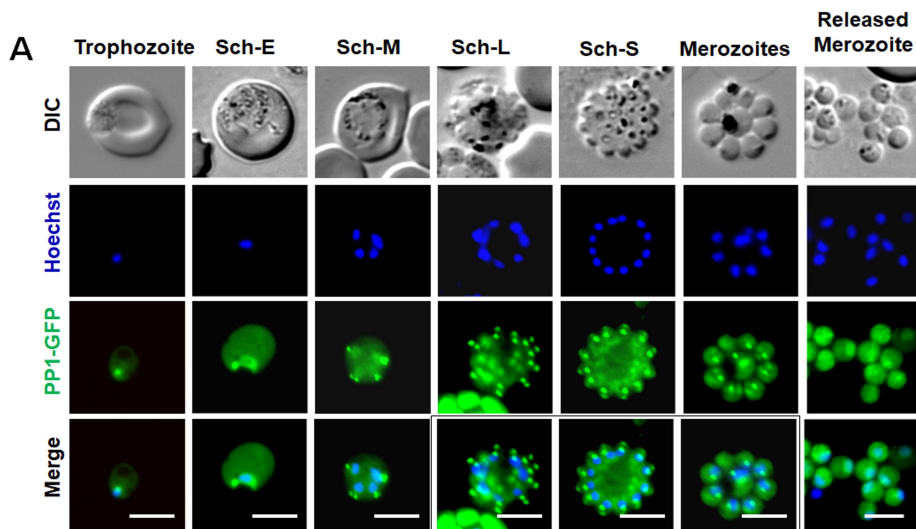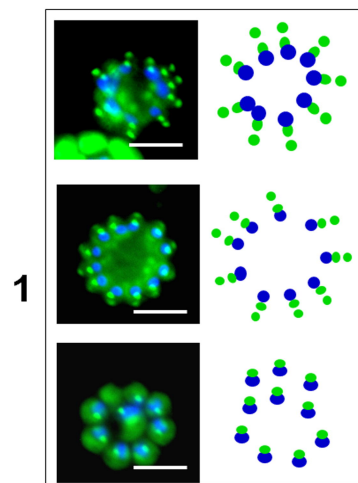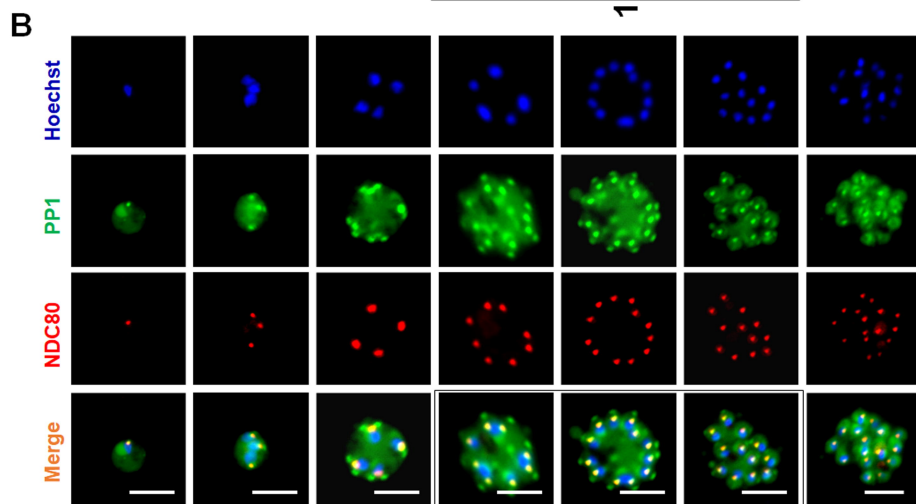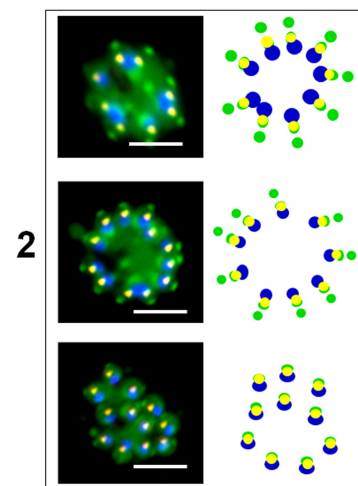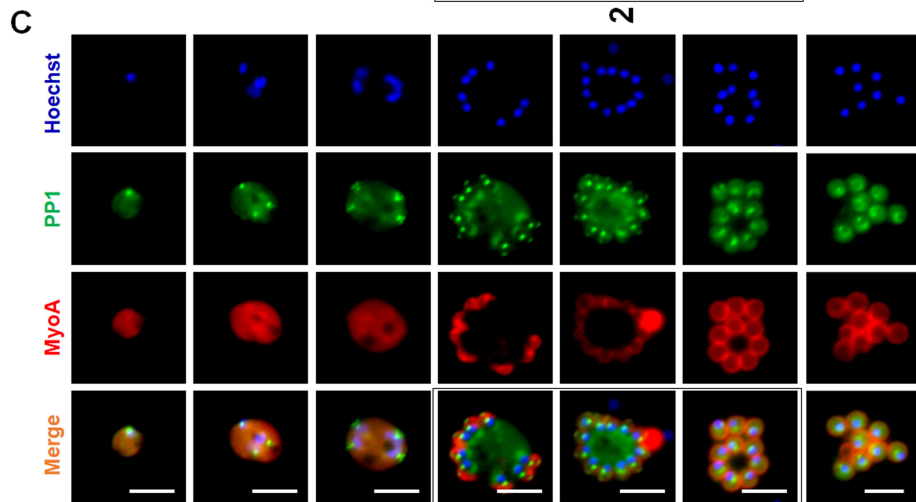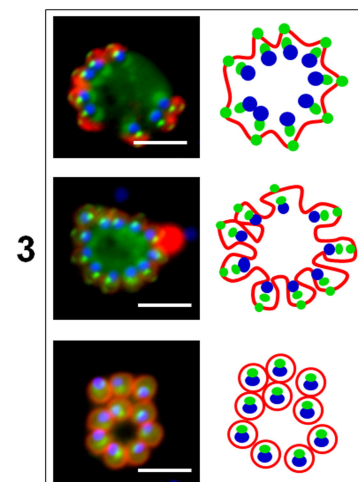

1

2

3



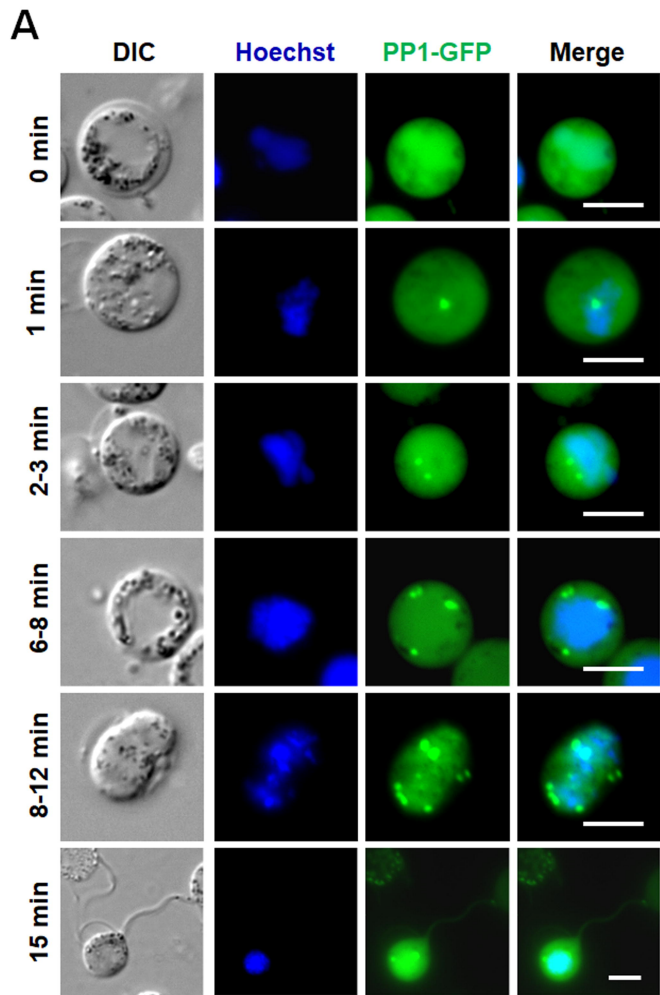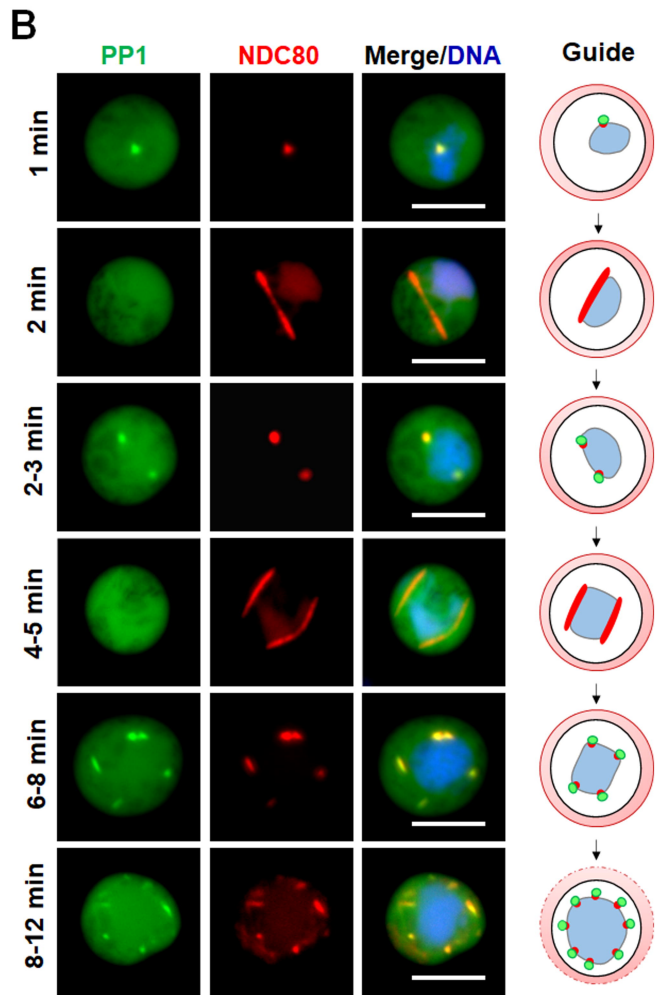

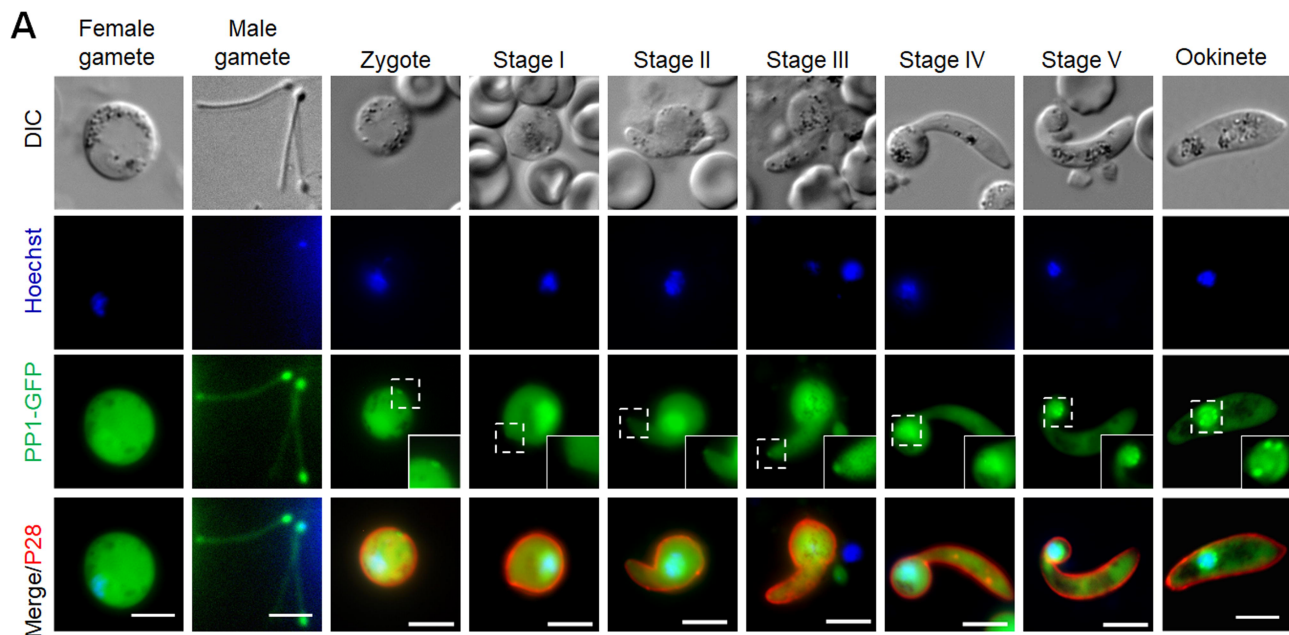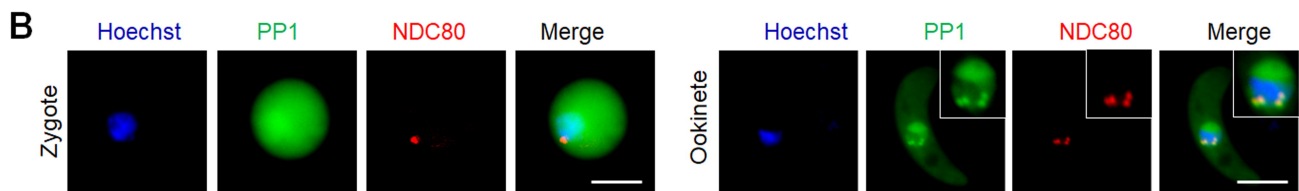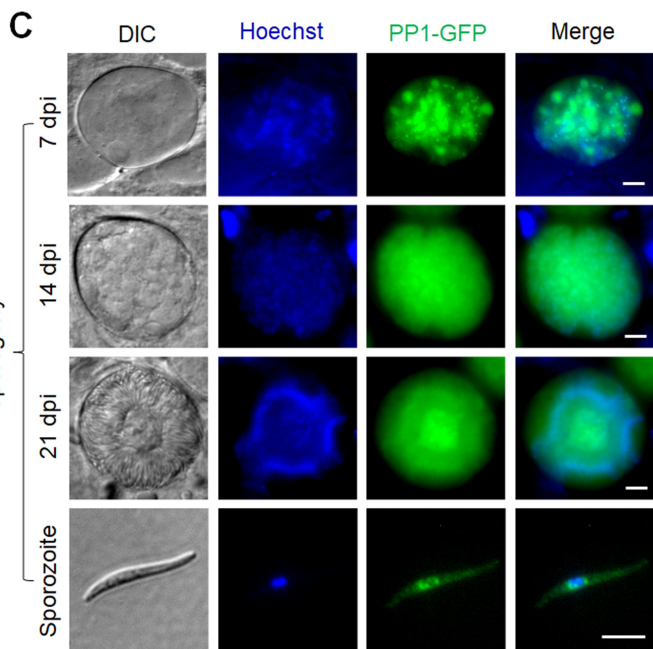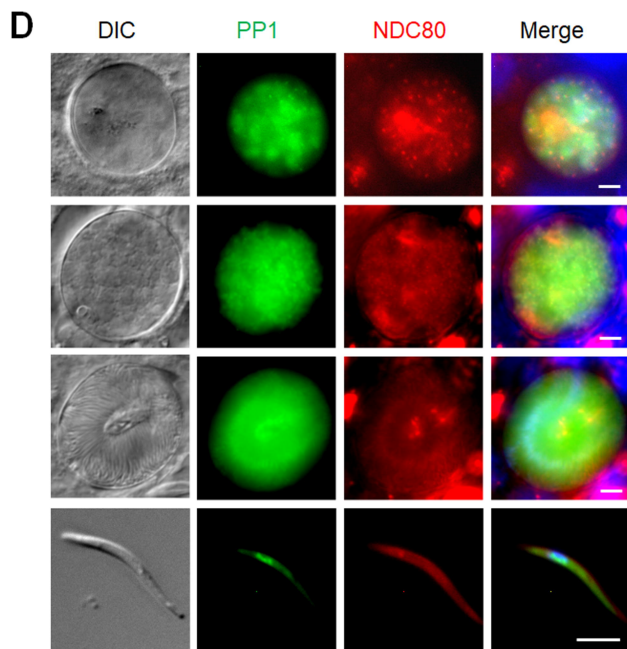

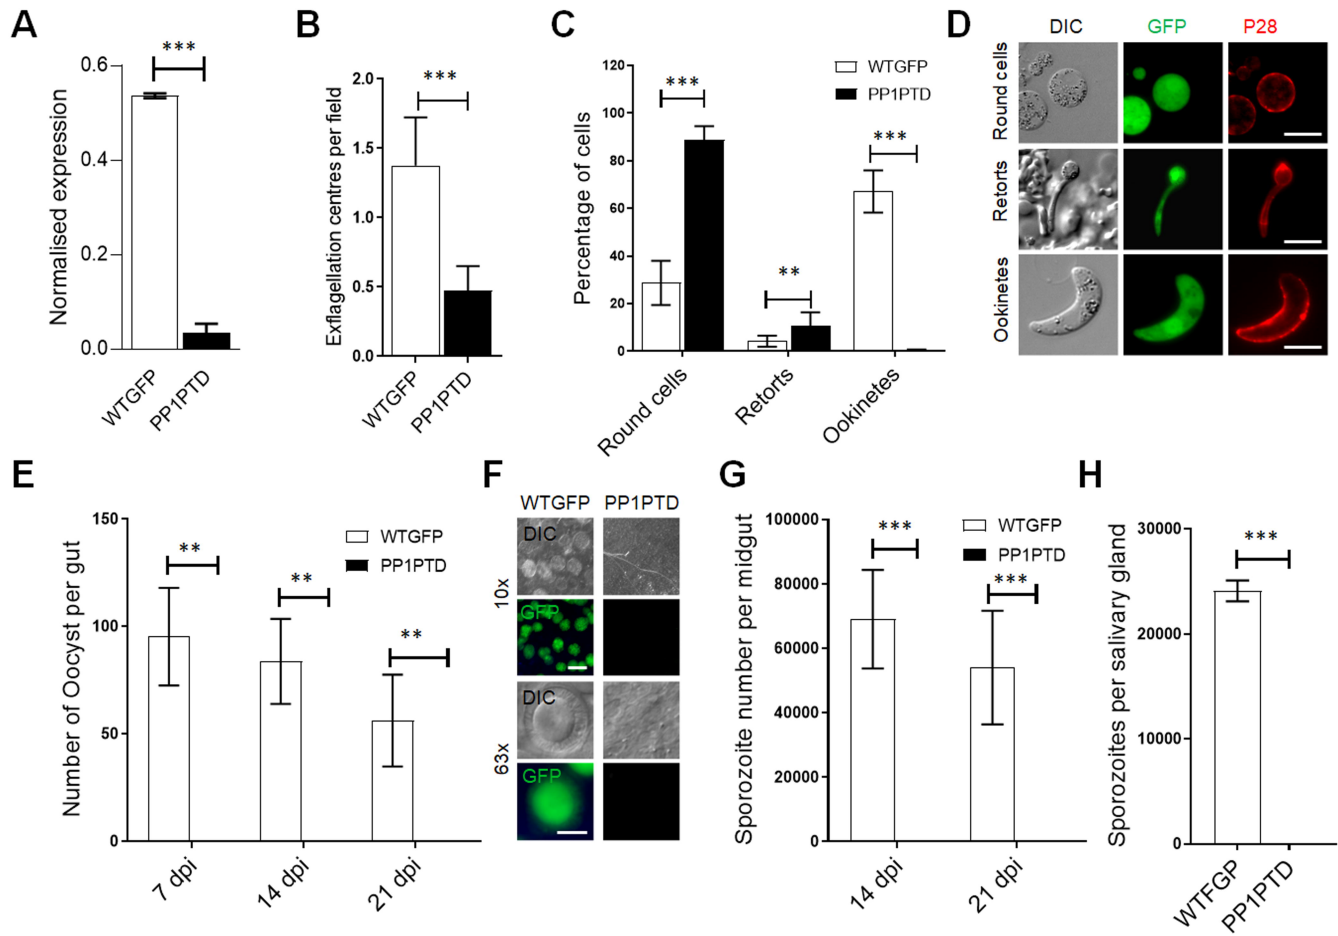

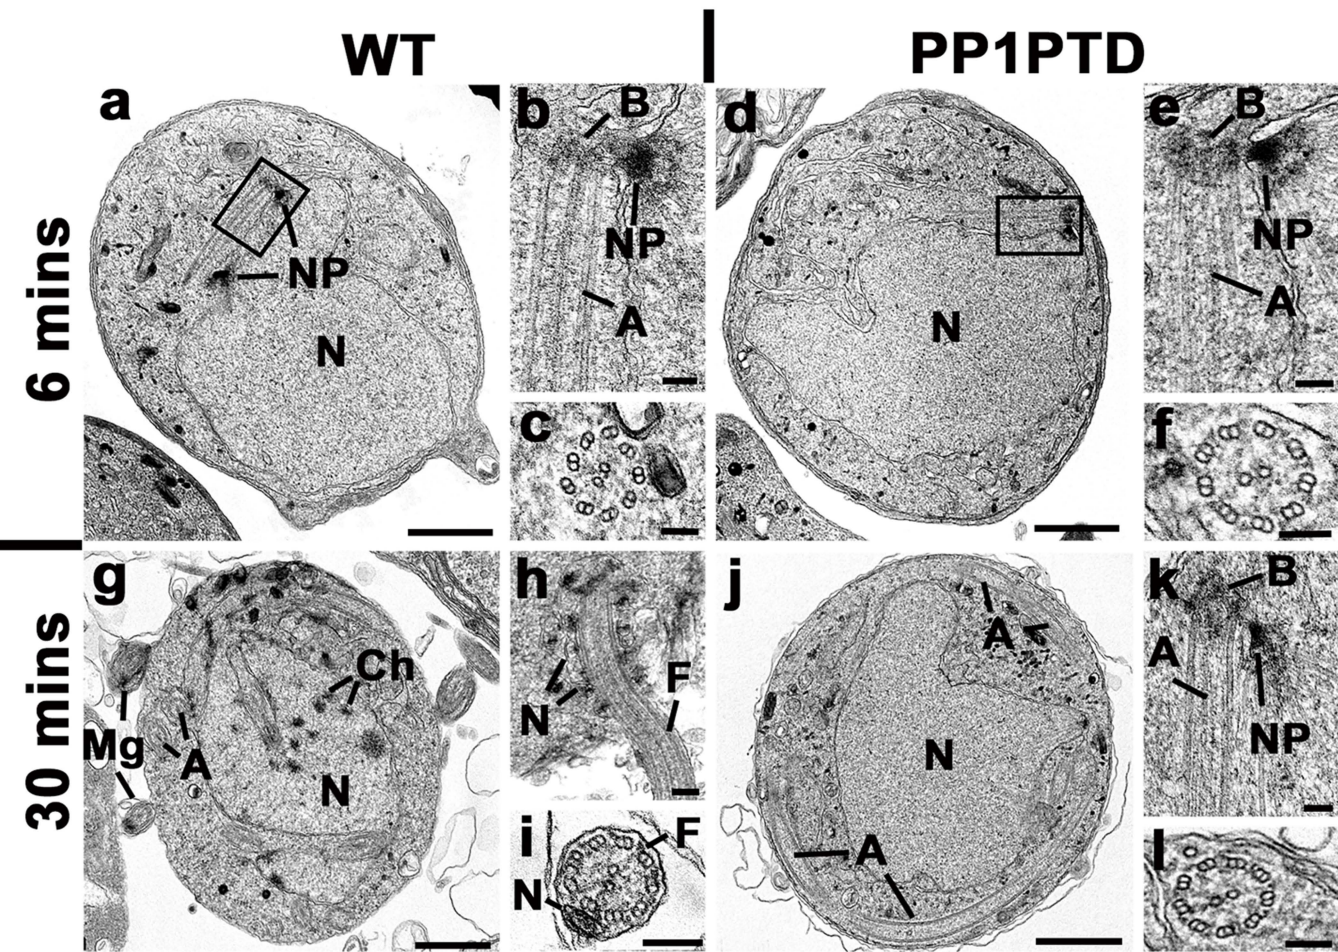

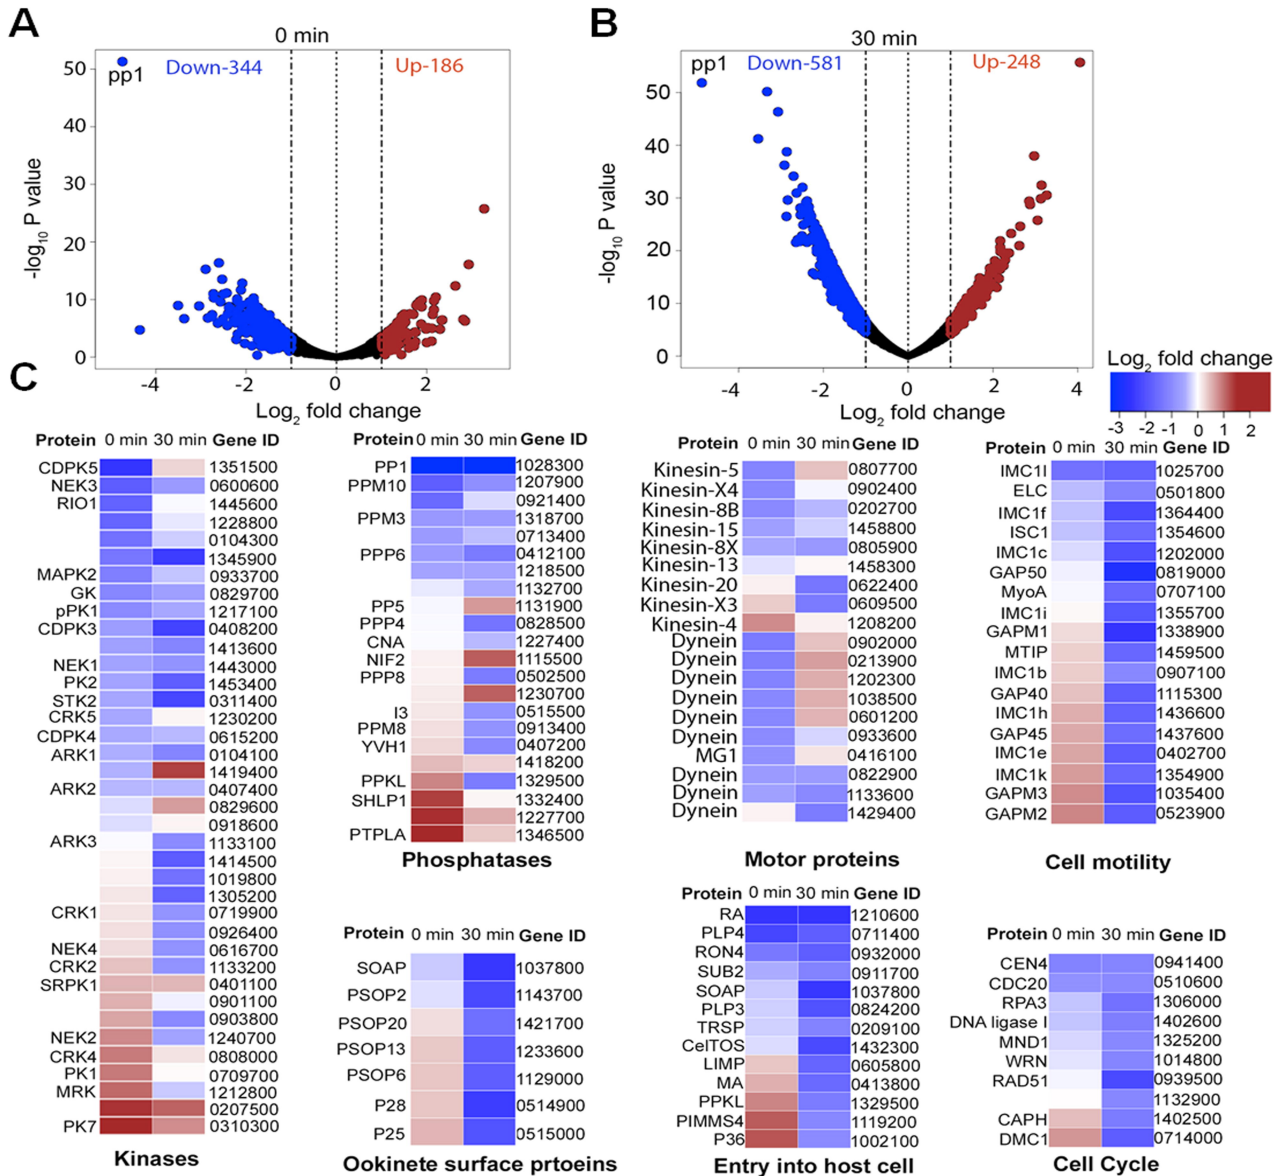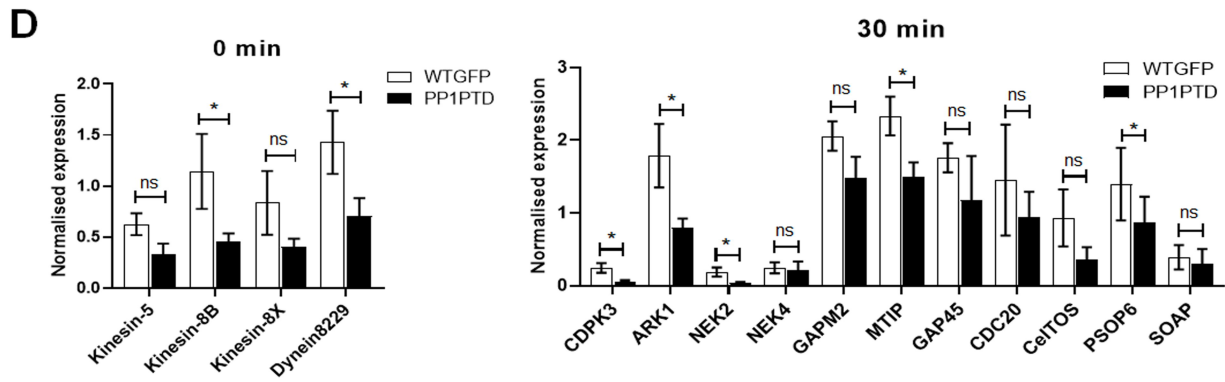

**A**

| <i>P. berghei</i><br>Gene ID | Product Description                       | Gene names | MW (kDa) | Schizonts- 24 h |    |     |   | Schizonts-10 h |    |     |   | Gametocytes-10 min |    |     |   |
|------------------------------|-------------------------------------------|------------|----------|-----------------|----|-----|---|----------------|----|-----|---|--------------------|----|-----|---|
|                              |                                           |            |          | PP1-GFP         |    | GFP |   | PP1-GFP        |    | GFP |   | PP1-GFP            |    | GFP |   |
|                              |                                           |            |          |                 |    |     |   |                |    |     |   |                    |    |     |   |
| PBANKA_1028300               | serine/threonine protein phosphatase PP1  | PP1        | 34963    | 31              | 26 | 23  | 0 | 37             | 26 | 25  | 0 | 23                 | 33 | 26  | 0 |
| PBANKA_1218500               | protein phosphatase inhibitor 2, putative | PPI2       | 16664    | 11              | 7  | 9   | 0 | 9              | 8  | 7   | 0 | 10                 | 9  | 9   | 0 |
| PBANKA_0516600               | leucine-rich repeat protein               | LRR1       | 36735    | 33              | 26 | 26  | 0 | 22             | 29 | 29  | 0 | 11                 | 22 | 25  | 0 |
| PBANKA_0601600               | conserved protein, unknown function       | NEMF-like  | 201925   | 36              | 17 | 35  | 0 | 21             | 37 | 21  | 0 | 12                 | 22 | 24  | 0 |
| PBANKA_0515500               | protein phosphatase inhibitor 3, putative | PPI3       | 13065    | 3               | 3  | 3   | 0 | 0              | 4  | 2   | 0 | 2                  | 2  | 3   | 0 |
| PBANKA_0515400               | conserved Plasmodium protein              | CD2BP2     | 77377    | 17              | 10 | 18  | 0 | 7              | 22 | 12  | 0 | 3                  | 2  | 9   | 0 |
| PBANKA_0310800               | RTR1 domain-containing protein, putative  | RTR1-like  | 97344    | 15              | 8  | 11  | 0 | 19             | 32 | 19  | 0 | 0                  | 0  | 7   | 0 |
| PBANKA_1458800               | kinesin, putative                         | kinesin-15 | 164999   | 0               | 0  | 0   | 0 | 0              | 0  | 0   | 0 | 2                  | 7  | 2   | 0 |
| PBANKA_0202700               | kinesin-8, putative                       | kinesin-8B | 168815   | 0               | 0  | 0   | 0 | 0              | 0  | 0   | 0 | 2                  | 4  | 2   | 0 |
| PBANKA_1458300               | kinesin-13, putative                      | kinesin-13 | 117181   | 0               | 0  | 0   | 0 | 0              | 0  | 0   | 0 | 0                  | 3  | 3   | 0 |
| PBANKA_0917400               | armadillo repeat protein PF16             | PF16       | 57748    | 0               | 0  | 0   | 0 | 0              | 0  | 0   | 0 | 0                  | 2  | 2   | 0 |

**B**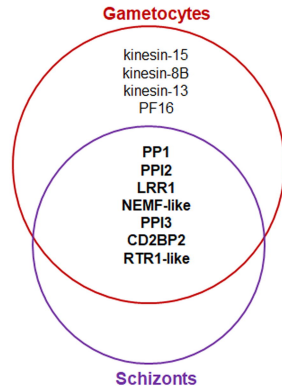

Source: https://www.biorxiv.org/content/biorxiv/early/2021/04/30/2021.01.15.426883.full.pdf
